1 **Social hierarchy position in female mice is associated with**  
2 **plasma corticosterone levels and hypothalamic gene**  
3 **expression**

4  
5 **Cait M. Williamson<sup>1</sup>, Won Lee<sup>1</sup>, Alexandra R. Decasien<sup>2,3</sup>, Alesi Lanham<sup>1</sup>, Russell**  
6 **D. Romeo<sup>4</sup> & James P. Curley<sup>1, 5\*</sup>**

7  
8 <sup>1</sup> Department of Psychology, Columbia University, New York, NY, 10027, USA

9 <sup>2</sup> Department of Anthropology, New York University, New York, NY 10003, USA

10 <sup>3</sup> New York Consortium in Evolutionary Primatology, New York, NY, 10024, USA

11 <sup>4</sup> Department of Psychology, Barnard College, New York, NY, 10027, USA

12 <sup>5</sup> Department of Psychology, University of Texas at Austin, Austin, Texas, 78712, USA

13 \* Corresponding author: [curley@utexas.edu](mailto:curley@utexas.edu)

## 14 **Abstract**

15 Social hierarchies emerge when animals compete for access to resources such as food, mates or physical  
16 space. Wild and laboratory male mice have been shown to develop linear hierarchies, however, less is  
17 known regarding whether female mice have sufficient intrasexual competition to establish significant  
18 social dominance relationships. In this study, we examined whether groups of outbred CD-1 virgin  
19 female mice housed in a large vivaria formed social hierarchies. We show that females use fighting,  
20 chasing and mounting behaviors to rapidly establish highly directionally consistent social relationships.  
21 Notably, these female hierarchies are less linear, steep and despotic compared to male hierarchies.  
22 Female estrus state was not found to have a significant effect on aggressive behavior, though dominant  
23 females had elongated estrus cycles (due to increased time in estrus) compared to subordinate females.  
24 Plasma estradiol levels were equivalent between dominant and subordinate females. Subordinate  
25 females had significantly higher levels of basal corticosterone compared to dominant females. Analyses  
26 of gene expression in the ventromedial hypothalamus indicated that subordinate females have elevated  
27 ER $\alpha$ , ER $\beta$  and OTR mRNA compared to dominant females. This study provides a methodological  
28 framework for the study of the neuroendocrine basis of female social aggression and dominance in  
29 laboratory mice.

## 30 Introduction

31 The contextual and neurobiological factors that influence male intrasexual aggression and social  
32 dominance have been well-studied across species<sup>1-6</sup>. Conversely, female aggression and social  
33 dominance have been relatively understudied, with most work focused on maternal aggression  
34 expressed by females when they are pregnant or during the early postpartum period where the  
35 behavioral focus is on maternal defense of offspring<sup>7,8</sup>. Few studies have investigated the contextual and  
36 neurobiological factors that influence female-female aggression outside of reproduction in rodents<sup>9,10</sup>.

37 Social hierarchies are likely to emerge whenever there is competition between individuals for resources  
38 such as food, water, territory or access to mates<sup>11</sup>. The more intense this competition is, the more likely  
39 it is that a highly linear social hierarchy will develop. In mammals, male social hierarchies are common as  
40 inter-sexual competition is typically dramatically higher in males compared to females, though there are  
41 notable exceptions such as hyenas where females have high levels of intra-sexual conflict and form  
42 strong female hierarchies<sup>11</sup>. Female hierarchies have also been observed in other species that have  
43 female intrasexual competition for access to resources including degus<sup>12</sup>, bison<sup>13</sup>, caribou<sup>14</sup>, red deer<sup>15</sup>,  
44 vervet monkeys<sup>16</sup>, and chimpanzees<sup>17</sup>. Less is known about the formation of social hierarchies in female  
45 wild mice, though some population studies suggest that females do generate some form of social  
46 hierarchy with dominant aggressive females establishing territories and subordinate females being  
47 unable to do so when population sizes increase<sup>18,19</sup>. Conversely, when population density is very low it  
48 appears that female wild mice have relatively little intra-sexual competition and do not form  
49 hierarchies<sup>20</sup>. Female-female aggression also appears to be low if females have social experience with  
50 each other prior to the intra-sexual competition<sup>21,22</sup>. Conversely, small groups of female laboratory mice  
51 can establish social ranks based on home cage social interactions<sup>23</sup> or their performance in the tube-  
52 test<sup>24,25</sup>.

53 Previously, we have explored the complex group dynamics and neurobiology of male social hierarchies,  
54 demonstrating that male outbred CD-1 mice living in groups of up to 30 individuals will form highly  
55 linear social hierarchies when living in a large laboratory-based vivarium<sup>5,26,27</sup>. As relatively little is known  
56 about whether large groups of non-reproductively active female mice will form social hierarchies in the  
57 laboratory, we aimed to explore this question by housing groups of 12 virgin outbred CD-1 female mice  
58 in large vivaria. One historical reason why female behavior is so vastly understudied in comparison to  
59 male behavior in laboratory rodents is due to concerns that female behavior is more variable than males  
60 due to fluctuations in steroid hormone levels across the female estrus cycle. Indeed, estrus state has  
61 been shown to influence many behavioral states including anxiety-like behavior and exploration<sup>28</sup>,  
62 motivation, addiction<sup>29</sup> and fear<sup>30</sup>. In rodents, some species also show variation in aggressive behavior  
63 across the estrous cycle<sup>31</sup>. Female California deer mice<sup>32</sup>, rats<sup>33,34</sup> and hamsters<sup>35-38</sup> are less likely to  
64 show aggressive behavior during estrus than diestrus, although other studies have found no effect of  
65 estrus state on aggressive behavior<sup>39-42</sup>. There is also mixed evidence for estrous effects on aggression in  
66 female house mice.<sup>43 44</sup> Given the potential significance of estrous state on female dominance and  
67 subordinate behaviors, we examined whether the estrous state of females is associated with the  
68 frequency of aggressive behavior within social hierarchies.

69 The neurobiological basis of female intrasexual aggression among non-reproductive females is receiving  
70 increased attention though much less is still known compared to male intrasexual aggression<sup>9,10</sup>. As in  
71 males, brain regions in the social behavior network (medial amygdala (meA), bed nucleus of the stria  
72 terminalis (BNST), lateral septum (LS), medial preoptic area (mPOA), anterior hypothalamus (AH),  
73 ventromedial hypothalamus (VMH) and periaqueductal grey (PAG)) as well as the mesocorticolimbic  
74 dopamine pathway have been found to form the basis of the neural circuit regulating aggression,  
75 though there are some important sex differences<sup>10</sup>. In particular, it is well-established that the VMH is a  
76 key modulator of aggression in non-reproductive female rodents<sup>9</sup>. Further, estradiol, the major estrogen  
77 steroid hormone, has been primarily associated with promoting aggressive behaviors in females<sup>45-47</sup>.  
78 Estradiol acts to alter the expression of gene products in the hypothalamus, including progesterone  
79 receptors (PR), oxytocin receptors (OTR), opioid receptors, and gonadotropin-releasing hormone  
80 (GnRH), all of which are known to regulate female social behaviors including social recognition, memory  
81 and aggression<sup>48</sup>.

82 The current study used an established paradigm developed in our lab applied to the study of male social  
83 hierarchy dynamics to study female social hierarchy behavior and begin to disentangle underlying  
84 neurobiological and neuroendocrine mechanisms. We investigated the hierarchical structure of eight  
85 groups of twelve females as well as plasma corticosterone and plasma estradiol concentrations for  
86 dominant and subordinate mice within these hierarchies. In male mice, social stressors such as social  
87 defeat and social stability are known to lead to increases in basal levels of corticosterone but findings  
88 from female mice are more variable<sup>49,50</sup>. We have previously found that subordinate male mice have  
89 elevated corticosterone levels compared to dominant male mice but only if the dominant males are  
90 highly despotic. We predicted that female subordinate mice may also show higher levels of basal  
91 corticosterone compared to dominant females, although previous studies have not found a consistent  
92 relationship between social dominance and plasma corticosterone in female mice<sup>23,51</sup>. We further  
93 examined gene expression differences between dominant and subordinate individuals in the VMH and  
94 mPOA of the hypothalamus across six genes known to modulate various aspects of social behavior and  
95 moderated by the action of estrogen: ER $\alpha$ , ER $\beta$ , PR, OTR, OPRM1, and GnRH. The aim of this work was  
96 to establish a feasible methodology for the study of female aggression and dominance, as well as their  
97 neurobiological and neuroendocrine mechanisms, outside of the reproductive period in laboratory mice.

## 98 **Results**

### 99 **Hierarchy measures and organization**

100 Sociomatrices of win-loss data for all female groups as well as the emergence of individual dominance  
101 ranks over time are presented in **Figure 1** and supplemental **Figure S1**. Summary statistics of several  
102 aspects of the hierarchical structure of each group are provided in **Table 1**. We found that seven out of  
103 the eight social groups formed a significantly linear and steep social hierarchy as measured by modified  
104 Landau's  $h'$ , triangle transitivity and steepness. All eight social groups had significantly high directional  
105 consistency of agonistic behavior, indicating that the majority of wins were directed from more  
106 dominant to more subordinate individuals. Female groups had relatively low despotism values,  
107 indicating that alpha females were not exerting complete dominance over all other females. This

108 interpretation was confirmed by moderate Gini Coefficient values for wins, demonstrating that the  
109 number of wins made by dominant females was fairly evenly distributed between the top ranked  
110 females. Initial body weight measured at the beginning of group housing was not related to final  
111 dominance rank in any group (Spearman Rank correlation tests: all  $p > 0.12$ ).

### 112 **Emergence of hierarchies over time**

113 Despite having no previous social experience with each other, 4 of 8 social groups had a significantly  
114 linear hierarchy by the end of Day 1 that continued throughout the 14-day observation period (**Figure 2**).  
115 Two further social groups were significantly linear by the end of Day 2 and thereafter. One cohort did  
116 not have a stable linear hierarchy until Day 9, although this hierarchy did show significant triangle  
117 transitivity on Days 1 and 4 suggesting some linearity in the first week of co-housing. The social group  
118 that did not have a significant hierarchy by the end of the observation period did have some linear  
119 organization, having a significantly linear hierarchy on Day 3.

### 120 **Sex differences in mouse social hierarchies**

121 Female social hierarchies were significantly different from male social hierarchies in several aspects of  
122 their dominance organization (see Methods about male comparison group). Female social hierarchies  
123 were significantly less linear by triangle transitivity ( $W=14$ ,  $p < 0.05$ ) and had lower directional  
124 consistency ( $W=0$ ,  $p < 0.001$ ) than male social hierarchies (**Figure 3**). The distribution of power was more  
125 even in females than in males. Alpha females were significantly less despotic than alpha males ( $W = 1$ ,  
126  $p < 0.001$ ), and the Gini coefficient of wins ( $W=0$ ,  $p < 0.001$ ) was significantly lower in female hierarchies  
127 than male hierarchies. There was no difference in the steepness of hierarchies ( $W=31$ ,  $p=0.460$ ), the Gini  
128 coefficient of losses ( $W=32$ ,  $p=0.515$ .) or Landau's modified  $h'$  value ( $W=23$ ,  $p=0.146$ ).

### 129 **Frequency of each agonistic behavior over the group housing period**

130 The hourly rate of each agonistic behavior is shown in **Figure S2**. Fighting and chasing were observed at  
131 significantly higher rates than mounting. The rate of fighting behavior showed a significant decrease by  
132 day over the group housing period ( $b_{\text{day}} = -0.62$  [-0.89, -0.36]) while those of chasing and mounting  
133 behaviors did not show significant changes by day (chasing:  $b_{\text{day}} = 0.08$  [-0.29, 0.44]; mounting:  $b_{\text{day}} = 0.10$   
134 [-0.03, 0.23]).

### 135 **Relationships between mounting, chasing and fighting**

136 To determine if the directionality of fighting, chasing and mounting was consistent between individuals  
137 we performed QAP correlation tests on the fighting, chasing and mounting sociomatrices (**Figure S3**).  
138 Fighting and chasing sociomatrices were highly correlated across all cohorts (data presented as median  
139 [IQR] across all eight cohorts:  $r=0.79$  [0.75, 0.80], all  $p < 0.001$ ). Chasing and mounting sociomatrices were  
140 also significantly correlated across all cohorts ( $r=0.44$  [0.38, 0.54], all  $p < 0.025$ ). Fighting and mounting  
141 sociomatrices were correlated for 7/8 cohorts ( $r=0.37$  [.35,.39], all  $p < .025$  for significant correlations).  
142 See supplemental **Figure S3** for individual sociomatrices.

### 143 **Directional consistency of each agonistic behavior**

144 All groups showed highly significant directionally consistent behavior for all behaviors (all  $p < 0.001$ ).  
145 Notably, the most directionally consistent behavior was mounting behavior (median [IQR] = 0.87 [0.83,  
146 0.93]), which was more consistent than chasing (0.75 [0.70, 0.77]) and significantly more consistent than  
147 fighting (0.72 [0.69, 0.74]) (**Figure S4A**; Friedman's test  $X^2 = 7$ ,  $df = 2$ ,  $p = 0.03$ ; post-hoc test mounting vs  
148 fighting  $p = 0.033$ , mounting vs chasing  $p = 0.112$ ).

#### 149 **Frequency of each agonistic behavior across individuals and ranks**

150 As expected, the Gini coefficient for the total number of attacks and chases made by the females in each  
151 group was moderately high, indicating that a few females are responsible for a disproportionate number  
152 of these aggressive acts (**Figure S4B and S4C**). Unexpectedly, the Gini coefficient for mounting other  
153 females was even higher than for fighting or chasing across cohorts (Friedman Test:  $X^2 = 12$ ,  $df = 2$ ,  
154  $p = 0.002$ ; post hoc tests  $p < 0.01$ ). This analysis demonstrates that in each social group a small number of  
155 females are responsible for a very large proportion of all mounting acts. The Gini coefficient for the total  
156 number of attacks and chases received by each female in each social group was moderately low. This  
157 finding indicates that most females are the recipients of fights and chases and these events are  
158 relatively evenly distributed across females in each social group. Again, it was unexpected that the Gini  
159 coefficient of mounts received was significantly higher than that for receiving the other two behaviors  
160 (Friedman Test:  $X^2 = 9.2$ ,  $df = 2$ ,  $p = 0.01$ ; post hoc tests  $p < 0.05$ ). This finding indicates that being mounted  
161 is far more unequally distributed across females in each group than being chased or being attacked:  
162 certain females in each social group are the targets for a disproportionately high number of mounts  
163 from other females.

164 We further examined if there is an effect of social rank on the hourly occurrence rate of each agonistic  
165 behavior either given or received. Fighting and chasing, but not mounting, were exhibited at significantly  
166 higher hourly rates by more dominant females (**Figure 4**, fighting given:  $b_{\text{rank}} = -1.11$  [-1.44, -0.81];  
167 chasing given:  $b_{\text{rank}} = -1.13$  [-1.46, -0.85]; mounting given:  $b_{\text{rank}} = -0.25$  [-0.61, 0.12]). Similarly, there were  
168 significant effects of social rank on the hourly rate of receiving fighting and chasing but not mounting,  
169 showing more subordinate females received more fighting and chasing behaviors (fighting given:  $b_{\text{rank}} = -$   
170  $0.38$  [0.19, 0.58]; chasing given:  $b_{\text{rank}} = 0.47$  [0.25, 0.71]; mounting given:  $b_{\text{rank}} = 0.10$  [-0.20, 0.42]).  
171 Although animals of each rank differed in the absolute frequencies of each agonistic behavior used,  
172 there was no effect of rank on the proportion of each behavior used (**Figure S5**). That is, all animals use  
173 each behavior proportionally equivalently.

#### 174 **Estrus cycle and female behavior**

175 The median (+/- IQR) proportion of time that individuals were in each estrous state were - estrus: 33.3%  
176 [25.8%, 46.7%]; proestrus: 21.4% [13.3%, 36.4%], diestrus: 14.3% [0.08%, 23.1%], metestrus: 21.4%  
177 [14.3%, 28.6%] (**Figures. 5A and 5B**). Female mice with higher social rank were more likely to be in  
178 estrus compared to metestrus or proestrus (log-odds of being in estrus vs. metestrus: 0.48 [0.02, 0.95];  
179 estrus vs. proestrus: 0.36 [0.18, 1.57]). Mice did not significantly differ by social rank in the likelihood to  
180 be in estrus compared to diestrus (estrus vs. diestrus: 0.50 [-0.03, 1.06]), or between other states  
181 (metestrus vs. proestrus: 0.32 [-0.36, 1.05]; metestrus vs. diestrus: 0.02 [-0.57, 0.58]; proestrus vs.  
182 diestrus: -0.22 [-0.78, 0.35]).

183 Overall there was no large effect of daily estrus state on the hourly rate of giving or receiving aggression.  
184 There was small effect that mice showed a higher hourly rate of giving aggression when in metestrus  
185 compared to proestrus ( $b_{\text{metestrus-proestrus}}$ : 0.19 [0.005, 0.35]). We further examined the effect of daily  
186 estrus state on the hourly rate of giving or receiving each agonistic behavior individually (fighting,  
187 chasing, mounting). For the rate of giving chases, mice had a higher rate when they are in metestrus  
188 compared to diestrus and proestrus ( $b_{\text{metestrus-diestrus}}$ : 0.22 [0.03, 0.40];  $b_{\text{metestrus-proestrus}}$ : 0.19 [0.01, 0.36]).  
189 Compared to during diestrus, mice received higher rates of mounting when they were in estrus or  
190 metestrus ( $b_{\text{estrus-diestrus}}$ : 0.31 [0.09, 0.53];  $b_{\text{metestrus-diestrus}}$ : 0.33 [0.08, 0.58]). The hourly rates of other  
191 behaviors given or received did not differ across different estrus states.

## 192 Plasma corticosterone and estradiol levels

193 Plasma corticosterone levels were found to be significantly higher for subordinate individuals as  
194 compared to dominant individuals (**Figure 6A**,  $b_{\text{subordinate-dominant}}$ : 153.9 ng/ul [107.6, 200.0]). We did not  
195 find an effect of estrus cycle state on corticosterone level. There was no effect of dominant-subordinate  
196 status on plasma estradiol levels (**Figure 6B**,  $b_{\text{subordinate-dominant}}$ : -2.97 pg/ul [-8.03, 1.99]). Mice that were in  
197 diestrus state on the day of blood collection had significantly higher estradiol levels compared to those  
198 that were in metestrus or proestrus ( $b_{\text{diestrus-metestrus}}$ : 6.79 pg/ul [0.29, 13.2];  $b_{\text{diestrus-proestrus}}$ : 10.1 pg/ul  
199 [3.07, 17.5]). There was no effect of estrus state on the estradiol levels among other states.

## 200 Gene expression in the VMH and the mPOA

201 In the VMH, there was small but significant effect of dominant-subordinate status on the levels of  
202 expression in the VMH of ER $\alpha$ , ER $\beta$ , and OTR genes (**Figure 7**), with subordinate mice showing higher  
203 expression than dominants. There were no significant differences in expression levels of OPRM1 and PR  
204 genes in the VMH. There were no significant differences between dominant and subordinate individuals  
205 in the expression any of the genes examined in the mPOA.

206

## 207 Discussion

208 Here we show that female mice living in social groups of up to 12 females are capable of forming  
209 significantly linear dominance hierarchies that are stable for up to 14 days. Seven out of eight female  
210 social groups had significantly linear hierarchies, as measured by Landau's h-value and triangle  
211 transitivity, and significantly steep hierarchies as measured by the relative differences in David's scores.  
212 All eight female social groups had significantly high directional consistency of agonistic behavior  
213 demonstrating that dominant individuals more often won competitive interactions against subordinate  
214 individuals. Similar to males, female mammals can form stable dominant-subordinate relationships  
215 whenever there is intrasexual competition for resources<sup>23,24,52-54</sup>. In our study of virgin female mice,  
216 there is no intrasexual competition for access to mates or food and water, however, female mice may  
217 compete for access to preferred areas of the vivaria (such as nestboxes) or bedding. Our results also  
218 extend the findings from studies of round-robin tube-tests conducted in groups of 5 or 8 female mice  
219 that report that females were capable of forming linear social hierarchies based on wins and losses in  
220 that competitive exclusion test<sup>24,25</sup>. These findings are also consistent with studies of wild mice that have



221 shown that females will form territorially based social hierarchies when living in large environments with  
222 relatively high population densities<sup>18,19</sup>. It appears that there may be a critical population density limit  
223 required for there to be sufficient intrasexual competition for females to engage in sufficient aggression  
224 to establish hierarchies, as one recent study found that groups of six females living in enclosures of 7m<sup>2</sup>  
225 did not form social hierarchies<sup>20</sup>.

226 Our results demonstrate that females use fighting, chasing and mounting behaviors to establish and  
227 maintain dominance relationships. The highest rates of fighting were observed during the establishment  
228 of hierarchies (which typically occurred rapidly within the first two days), and the rate of fighting  
229 significantly decreased thereafter. The rates of chasing and mounting did not decrease across the  
230 housing period. Unsurprisingly, given the existence of a linear hierarchy, higher ranked individuals  
231 exhibited higher rates of fighting and chasing than lower ranks. Similarly, lower-ranked individuals  
232 received higher amounts of each of these behaviors. With respect to mounting behavior, we did not  
233 observe a significant overall effect of rank on the rate of giving or receiving mounting. Indeed, there has  
234 been some controversy as to the proximal function of female-female mounting in rodents and whether  
235 it should be considered to be a dominance behavior, a sexual behavior, a masculinized behavior or  
236 something else<sup>55-57</sup>. Our data suggest that mounting is being used by some females as a dominance  
237 behavior but not consistently by all individuals. That is, females are more likely to mount females  
238 subordinate to themselves but not all females engage in this behavior. We observed that the group  
239 sociomatrices for fighting, chasing and mounting behaviors given and received all highly correlated with  
240 each other, indicating that the direction and magnitude of these behaviors within each social  
241 relationship was consistent. Secondly, we observed that the directional consistency of mounting  
242 behavior (0.87) was even stronger than the directional consistency for fighting (0.72) and chasing (0.75).  
243 This finding indicates that mounting behavior consistently occurred 87% of the time in the direction of  
244 more dominant to more subordinate females. We also noted that females of all ranks, despite having  
245 different absolute rates of each behavior, used each of the three behaviors in roughly equal proportions  
246 -suggesting that higher- or lower-ranked females do not preferentially utilize mounting behavior over  
247 the other two as a dominance behavior. Additionally, the Gini coefficient of behavior given and received  
248 was significantly higher for mounting as compared to the other two agonistic behaviors. Thus, in each  
249 social group the majority of mounts given and received were by specific individuals, and these  
250 interactions occurred in a directionally consistent manner.

251 Female mouse hierarchies exhibit several differences when compared to male social hierarchies.  
252 Although both sexes produce linear hierarchies, those of females are less linear and have lower  
253 directional consistency than male hierarchies. Male hierarchies tend to be despotic, with one alpha male  
254 exhibiting the vast majority of all aggressive acts<sup>5,26,27</sup>. We did not observe such despotism in female  
255 hierarchies as evidenced by the lower despotism scores and lower Gini coefficient of wins. More  
256 dominant females in social groups tend to more equally distribute aggression towards other lower-  
257 ranked females. These sex differences may be rooted in the ancestral biology of the house mice. In the  
258 wild, there are fundamental differences in the reproductive strategies of males and females. Males have  
259 high levels of intersexual competition and have high reproductive skew<sup>58</sup>. Females generally exhibit  
260 higher parental investment in offspring and have reduced conflict over reproductive opportunities<sup>54,59,60</sup>.  
261 Indeed, even when given the opportunity to compete for males, female mice do not necessarily increase



262 their rates of aggression<sup>20</sup>. Across mammals, female adaptations for intrasexual competition can involve  
263 more subtle behaviors such as low-level persistent aggression instead of overt displays of physical  
264 aggression<sup>54</sup>. Our data suggest that in laboratory mice there persists low-level aggression that results in  
265 females forming stable social hierarchies even with unlimited access to food, water, space and nesting  
266 material and no access to males.

267 We found that the estrous state of each female did not have a large effect on the likelihood of females  
268 giving or receiving aggression. Females in all states were equally likely to bite or be bitten. However, we  
269 did observe a very small effect for females in metestrus to have a higher rate of chasing than those  
270 females in proestrus or diestrus. Previous work in rodents has suggested that estrus state can influence  
271 the propensity of females to engage in intrasexual aggression although these effects are inconsistent  
272 and appear to be highly influenced by many other contextual factors. For instance, female mice have  
273 been reported to show higher aggression in the resident-intruder test during metestrus and proestrus  
274 compared to estrus and diestrus<sup>43</sup>. Similarly, female California mice show their highest aggression during  
275 diestrus compared to proestrus and estrus<sup>32</sup>. Such a decline in aggression during estrus has been  
276 suggested to facilitate mating, yet female mice in estrus have been shown to be capable of exhibiting  
277 aggression and forming dominant-subordinate relationships<sup>61</sup>. Conversely, no changes in female-female  
278 aggression across the estrous cycle have also been observed in rats and hamsters<sup>41,42</sup>. Although there  
279 was no effect of estrous state on the likelihood to mount other females, we did find that female mice in  
280 estrus or metestrus received significantly more mounts than those females in diestrus. This finding is  
281 somewhat consistent with evidence from several species including baboons<sup>62</sup>, squirrel monkeys<sup>63</sup>,  
282 hanuman langurs<sup>64</sup>, rabbits<sup>65</sup> and rats<sup>56</sup> that mounted females tend to be subordinates in estrus.

283 We observed that group-housed females had extended estrous cycles with prolonged periods of  
284 diestrus and estrus. The mouse estrus cycle is regulated by luteinizing hormone and follicle-stimulating  
285 hormone released from the pituitary in response to gonadotrophin releasing hormone released from  
286 the hypothalamus, which is in turn under control from estrogen and progesterone. The duration of this  
287 cycle is usually 4-6 days for females housed in isolation or in pairs, but can be much longer for group-  
288 housed females – an effect known as the Lee-Boot effect<sup>66-69</sup>. For instance, female mice living in groups  
289 of 8 have been shown to have estrous cycles lasting up to 14 days<sup>66</sup> and females in groups of 30 have  
290 estrus cycles up to 40 days in duration<sup>69</sup>. These cycles are typically extended due to longer periods of  
291 time spent in diestrus, but they may also become disrupted. Following exposure to males, females  
292 quickly enter estrus and become sexually receptive<sup>69</sup>. Our results are largely congruent with these  
293 earlier studies in that we do observe extended estrous cycles in group-housed animals. Notably, many  
294 females in our study were in estrus for prolonged periods of time, and this effect was larger in  
295 dominant females compared to subordinate females. It is possible that this is an adaptive mechanism by  
296 which dominant females ensure more or earlier mating opportunities than subordinate females,  
297 however it is unclear as to what physiological processes underpin the extended length of estrous cycles  
298 we observed.

299 We found no significant differences between dominant and subordinate mice in plasma estradiol.  
300 Peripheral estrogens are known to promote aggression in both males and females<sup>10,70,71</sup>, and therefore  
301 we predicted there would be higher estradiol levels in dominant females. However, our hormone

302 samples were taken at the end of group housing on Day 14 at a time when the social hierarchies had  
303 stabilized and aggression was at a low level. Further, estrogens can have many, sometimes opposite,  
304 effects, depending on where in the brain and on what receptors they are acting<sup>72,73</sup>. It is therefore  
305 perhaps not surprising that estradiol levels found in plasma at one time point do not differ between  
306 dominant and subordinate individuals.

307 Conversely, we did find that subordinate females had significantly higher levels of plasma corticosterone  
308 than dominant females. This effect was moderately large and much larger than the effect that we had  
309 previously observed in male hierarchies, where significant differences in plasma corticosterone levels  
310 between dominants and subordinates only occur in highly despotic hierarchies<sup>27</sup>. In females, all  
311 hierarchies were considered to be very low on the despotism scale. These results are interesting in the  
312 context of the established literature on sex differences in stress responses. Several studies have shown  
313 that male mice show a much more robust physiological response to stressors such as social defeat,  
314 social instability and chronic stress compared to female mice<sup>49,50</sup>. However, these results are not always  
315 consistent, and sometimes females do show increases in corticosterone depending on the social context  
316 of the stressor<sup>74-76</sup>. It has also been reported that highly aggressive territorial females living in large  
317 groups have elevated corticosterone compared to non-aggressive females<sup>51</sup>, though one other study  
318 found results consistent to ours that subordinate female mice had higher corticosterone than dominant  
319 females in small groups of up to five albino mice<sup>23</sup>. Elevated levels of corticosterone in subordinates  
320 post-hierarchy formation have been shown to facilitate social memories for being socially subordinate in  
321 rats<sup>77,78</sup>. The functional significance of the elevated corticosterone in subordinate females living in our  
322 relatively stable social housing remains to be addressed, but these data suggest the potential for  
323 studying female social hierarchies as a model of social stress.

324 The neurobiology of female intrasexual aggression has been relatively under-studied compared to that  
325 of male intrasexual aggression, although this area has started to receive increased attention<sup>9,10</sup>. Here we  
326 found that the expression of ER $\alpha$ , ER $\beta$  and OTR was moderately higher in subordinate female mice  
327 compared to dominant female mice in the VMH. The VMH is known to be a critical regulator of female  
328 aggression. Early studies in rats and hamsters demonstrated that lesions of the VMH lead to increased  
329 aggression by females<sup>45,79</sup>, whereas implants into the VMH with either estradiol or progesterone reduce  
330 aggression<sup>42,80,81</sup>. More recently in mice, estrogen-receptor expressing neuronal populations in the  
331 ventrolateral VMH have been found to become active when females bite versus mount other females<sup>82</sup>.  
332 This work builds on previous studies that demonstrated an important role for central estrogen receptors  
333 in regulating male and female aggression. ER $\alpha$  knockout male mice show reduced aggression towards  
334 other males<sup>83</sup>, whereas females lacking ER $\alpha$  expression are more aggressive to other females<sup>84,85</sup>. Loss of  
335 ER $\beta$  has also been associated with increased aggression in males<sup>86,87</sup>. Central administration of selective  
336 ER $\alpha$  agonists to female mice increases aggressive attacks in a resident-intruder paradigm<sup>88</sup>, while  
337 selective ER $\beta$  agonists treatment leads to an increase in non-aggressive social behaviors<sup>89</sup>. The role of  
338 each of these receptors in coordinating female aggressive behavior is clearly complex and context-  
339 dependent, but it is possible that our observed increased VMH expression in both ER $\alpha$  and ER $\beta$  in  
340 subordinate mice may underlie their inhibition of aggression. However, given the multitude of functions  
341 of these receptors in this region it is possible that these differences may be unrelated to aggression and  
342 associated with other social behaviors such as social recognition, learning and memory<sup>90</sup>.

343 Likewise, oxytocin acting on oxytocin receptors has a range of effects on social behavior in females, and  
344 its roles in promoting or inhibiting aggression are highly contextually dependent. In non-lactating  
345 females oxytocin generally appears to inhibit aggression<sup>10</sup>. OT knockout mice show reduced aggression  
346 to each other<sup>91</sup> and central or injections of OT into the MPOA or AH can reduce aggression<sup>92,93</sup>. These  
347 findings may be congruent with our finding that subordinate females have higher VMH OTR expression  
348 than dominant females. Notably, we did not observe any association between social status and mRNA  
349 levels of OTR or any other gene in the MPOA. Though some lesion studies in other rodents have  
350 reported a role for the MPOA in female aggressive behavior<sup>94</sup>, our results would suggest that plasticity in  
351 gene expression in response to an individual's social status occurs primarily in the VMH.

## 352 **Conclusion**

353 In the present study, we establish that outbred CD-1 female mice living in groups of 12 individuals are  
354 capable of forming significant linear hierarchies. These hierarchies are linear and directionally  
355 consistent, but less despotic than male social hierarchies. These hierarchies emerge quickly and are  
356 stable over 14 days and are relatively unaffected by the estrous cycle. All group-housed females also  
357 show an extended estrous cycle, and dominants spend longer in estrus than subordinate females.  
358 Subordinate females have significantly higher levels of plasma corticosterone than dominant females,  
359 suggesting that subordinate females are more susceptible to the social stress of group living than male  
360 mice. We also find that subordinate females have higher levels of ER $\alpha$ , ER $\beta$ , and OTR mRNA than  
361 dominant females in the VMH, suggesting that these genes in this region may facilitate in part the  
362 reduced aggression displayed by these females. This work furthers our understanding of group female  
363 social behavior, begins to explore sex differences between male and female social hierarchy formation  
364 and maintenance and provides evidence that the actions of estrogen may play a role in modulating  
365 female social hierarchy behavior.

## 366 **Methods**

### 367 **Subjects and housing**

368 A total of 96 female outbred CD1 mice were obtained from Charles River Laboratories at 7 weeks of age.  
369 Mice were housed in the animal facility in the Department of Psychology at Columbia University, with  
370 constant temperature (21-24°C) and humidity (30-50%). The room was kept on a 12/12 light/dark cycle,  
371 with white light (light cycle) on at 2400 hours and red lights (dark cycle) on at 1200 hours. All mice were  
372 uniquely marked by dyeing their fur with a blue, nontoxic animal marker (Stoelting Co.), enabling  
373 individuals to be identified throughout the study. These marks remain for up to 12 weeks and only  
374 require one application. All procedures were conducted with approval from the Columbia University  
375 Institutional Animal Care and Use Committee (IACUC Protocol No. AC-AAAP5405).

### 376 **Social behavior observations**

377 Following arrival at the animal facility, mice were housed in groups of 3 for 2 weeks in standard sized  
378 cages. At 9 weeks of age, groups of 12 mice were weighed and placed into large, structurally complex,  
379 custom built vivaria (length 150cm, height 80cm, width 80cm; Mid-Atlantic; **Figure S6**). The vivaria were

380 constructed as described in Williamson et al.<sup>26</sup>. Each vivarium consists of an upper level constructed of  
381 multiple shelves connected by plastic tubes and covered in pine bedding and a lower level comprised of  
382 5 interconnected standard sized cages filled with pine bedding and connected by a system of plastic  
383 tubes. Mice can access all levels of the vivarium at any time through this interconnecting system of  
384 ramps and tunnels. Standard chow and water were provided ad libitum on the top level of the vivarium.  
385 Social groups were created such that in each group of 12 females, each individual had previous social  
386 experience with maximum only one other individual and at least 6 females per group had absolutely no  
387 experience with any of the other individuals. Mice were placed in the vivarium at the onset of the dark  
388 cycle on Day 1 of the experiment and were observed by trained observers for 2 hours directly following  
389 introduction to the group and for 2 hours each day for the next two weeks (Day 1 – Day 14).  
390 Observations always occurred during the dark cycle at some point during the first 6 hours of lights off  
391 (red light). During these live observations, observers used all occurrence sampling to record the winner  
392 and loser in all instances of fighting, chasing, mounting, subordinate posture, and induced-flee behaviors  
393 (see **Table S1** for an ethogram of these behaviors). Winners of each encounter were considered to be  
394 those that chased, bit, mounted, or forced another individual to exhibit subordinate behavior. If  
395 behaviors between two females co-occurred within 2 seconds of each other they were recorded with  
396 the priority fighting, chasing, mounting, subordinate posture, flee. This method has been used  
397 previously in our lab to understand the social organization of groups of male mice<sup>5,6,26,27,95,96</sup>. Vaginal  
398 smears were collected from every mouse each evening at the same time of day (six to eight hours post  
399 lights-off). To collect the samples, trained lab members removed mice from the vivaria individually and  
400 placed them back as soon as the sample was collected. Collecting samples from each social group  
401 interrupted the group for less than 5 minutes. Smear samples were analyzed under a microscope by a  
402 single trained lab member and double checked by a second lab member to verify accuracy. Mice were  
403 weighed, final estrus smears taken, and euthanized via decapitation 2 hours post lights off on Day 15.  
404 Trunk blood was collected into heparinized tubes, immediately placed on ice, centrifuged at 4°C in a  
405 refrigerated centrifuge, and plasma separated and frozen at -80°C until analyzed for corticosterone and  
406 estradiol levels via radioimmunoassay. Brains were collected and flash frozen in hexane and stored at -  
407 80°C until dissection. At the end of group housing, the 2 most dominant and 2 most subordinate  
408 individuals were determined using the Glicko Rating System<sup>26,97</sup> as well as David's Scores<sup>26,98</sup>. Plasma  
409 hormone and brain mRNA levels were measured for these two most dominant and two most  
410 subordinate individuals in each group, except for in two cohorts where it was difficult to distinguish the  
411 beta and gamma female so three dominant individuals and two subordinate individuals were used.

## 412 **Hormone assays**

413 Plasma corticosterone and plasma estradiol concentrations were measured using commercially available  
414 kits (MP Biomedicals) and conducted using the manufacturer's specifications. For the corticosterone  
415 assay, the average inter-assay coefficient of variation was 9.3%, the lowest detectable was 24.78 ng/ul,  
416 and the highest detectable was 938.34 ng/ul. For the estradiol assay, the coefficient of variation was  
417 7.2%, the lowest detectable was 8.53 pg/ul, and the highest detectable was 2455.79 pg/ul.

## 418 **Gene expression**

419 Brains were stored at -80° C until dissection. Samples of the medial preoptic area (mPOA) and  
420 ventromedial hypothalamus (VMH) were collected using a Harris Micro-Punch with reference to the  
421 coronal plane from the Mouse Brain Atlas<sup>99</sup> and the Allen Brain Atlas<sup>100</sup>. The mPOA was collected as one  
422 1mm diameter area along the midline from Bregma +0.14 mm to -0.7 mm. The VMH was collected as  
423 one 1mm diameter area from each hemisphere from Bregma -1.34 mm to -1.82mm. RNA was isolated  
424 from both brain regions using the AllPrep RNA Micro Kit (Qiagen) and reverse transcribed to cDNA using  
425 the SuperScript III First-Strand Synthesis System for RT-PCR applications. Quantitative RT-PCR was  
426 performed with 1ul of cDNA using an ABI 7500 Fast Thermal Cycler and the Fast SYBR Green Master Mix  
427 reagent (Applied Biosystems). All primer probes (Sigma-Aldrich) were designed to span exon boundaries  
428 ensuring amplification of only mRNA. The following validated quantitative PCR primers were used for  
429 mRNA analysis: estrogen receptor alpha (ER $\alpha$  – Forward: CGTGTGCAATGACTATGCCTCT; Reverse:  
430 TGGTGCATTGGTTTGTAGCTGG), estrogen receptor beta (ER $\beta$  – Forward:  
431 GTCAGGCACATCAGTAACAAGGG; Reverse: ATTCAGCATCTCCAGCAGCAGGTC), progesterone receptor (PR  
432 – Forward: GCGAGAGACAACCTGCTTTCAGT; Reverse: CAAACACCATCAGGCTCATCCA), gonadotropin  
433 releasing hormone (GnRH – Forward: AGCACTGGTCCTATGGGTTG; Reverse: GGTTCTGCCATTTGATCCAC),  
434 oxytocin receptor (OTR – Forward: TTCTTCGTGCAGATGTGGAG; Reverse: CCAAGAGCATGGCAATGATG),  
435 opioid receptor  $\mu$  1 (OPRM1 – Forward: AATGTTTCATGGCAACCACAA; Reverse:  
436 TTTGAGCAGGTTCTCCAGT).

#### 437 **Statistical analysis**

438 All statistical analyses were undertaken in R v.3.5.0<sup>101</sup>.

#### 439 **Group dominance structure and social organization**

440 For each cohort, six measures of dominance structure and organization were calculated: Landau's  
441 modified  $h'$ , directional consistency, steepness, triangle transitivity, despotism and Gini's coefficient of  
442 wins and losses. The methods of calculation for these measures are detailed in Williamson et al.<sup>26</sup>, but  
443 briefly: Landau's modified  $h'$ , directional consistency, and steepness are calculated using frequency  
444 win/loss sociomatrices, which are created using the total frequency of wins and losses recorded for each  
445 individual over the observation period. Landau's modified  $h'$  evaluates the extent to which individuals in  
446 a hierarchy can be linearly ordered<sup>98</sup> and ranges from 0-1, with a value of 1 indicating a completely  
447 linear hierarchy. Triangle transitivity measures the proportion of relations between all triads that are  
448 transitive (i.e. if individual A is dominant to individual B and individual B is dominant to individual C, then  
449 individual A is dominant to individual C; a perfect hierarchy would have all transitive triads)<sup>102</sup>. It is  
450 calculated using a binary win/loss sociomatrix, where 1s are assigned to individuals in rows that won  
451 more often against individuals in columns and 0s are assigned to individuals in rows that lost more often  
452 to individuals in columns. Triangle transitivity ranges from 0-1, with 1 indicating that all triads are  
453 transitive (i.e. a perfectly linear hierarchy). Steepness measures the unevenness of relative individual  
454 dominance within the hierarchy. This is calculated from the relative distribution of David's Scores, a win  
455 proportion measure adjusted for strength of opponents<sup>103</sup>. It ranges from 0-1 with a score closer to 1  
456 indicating that power is not equitably distributed across the hierarchy, but rather lies in the hands of a

457 few powerful individuals at the top. Directional consistency measures the degree to which all agonistic  
458 interactions occur in the direction from the more dominant to more subordinate individual in the pair. It  
459 also ranges from 0-1, with 1 indicating that all agonistic interactions occur in the direction of dominant  
460 to subordinate. Significance testing for Landau's modified  $h'$ , triangle transitivity, steepness and  
461 directional consistency were carried out using appropriate randomization methods<sup>26</sup>. P-values represent  
462 the proportion of times that values were observed in randomized data that were greater than or equal  
463 to the observed values from empirical data. Despotism is the proportion of all wins by the dominant  
464 male over the total number of aggressive interactions over the observation period. It is a value between  
465 0-1, with 1 indicating that the alpha male performed 100% of all aggression within the group. Gini-  
466 coefficient is a measure of equality versus inequality in a distribution. We calculated the Gini-  
467 coefficients for the frequency of wins and losses by each animal across cohorts. It ranges from 0-1.  
468 Values closer to 1 indicate more inequality meaning that a higher number of wins/losses are associated  
469 with relatively few individuals. Values closer to 0 indicate that the frequency of wins/losses are equally  
470 distributed across all individuals. We examined the association between initial body weight on Day 1 of  
471 group housing and final social rank for each social group using Spearman Rank correlation tests.

472 Landau's modified  $h'$ , triangle transitivity, directional consistency and despotism were calculated using  
473 the R package 'compete' v.0.1<sup>104</sup>. Steepness was calculated using the R package 'steepness' v.0.2.2<sup>105</sup>.  
474 Gini coefficients were calculated using the 'ineq'<sup>106</sup> package.

475

#### 476 **Comparison between fighting, chasing and mounting behaviors**

477 Raw frequency sociomatrices were constructed for each cohort based separately on fighting, chasing  
478 and mounting behaviors. To determine how correlated each matrix (fighting, chasing or mounting) was  
479 to each other within each cohort we performed a Quadratic Assignment Procedure (QAP) test with 1000  
480 Monte Carlo randomizations of the data using the 'sna' package v.2.4<sup>107</sup>. From these matrices the  
481 directional consistency and Gini-coefficient of wins and losses was also calculated for each behavior for  
482 each cohort. To test if differences in these values existed between behaviors across cohorts we used  
483 Friedman Tests. Significant differences between behaviors were determined using Nemenyi Post-Hoc  
484 Tests using the 'PMCMR' R package v.4.3<sup>108</sup>.

#### 485 **Emergence of hierarchies and individual ranks**

486 To determine how quickly each cohort formed a linear hierarchy we calculated Landau's modified  $h'$  and  
487 triangle transitivity as well as running significance tests for the aggregated win-loss data for each cohort  
488 up to each day. The emergence of individual ranks across time was identified using Glicko ratings. All  
489 individuals begin with a Glicko rating of 2200, and points are added or subtracted based on winning or  
490 losing against other individuals. The degree of points won or lost is dependent upon the difference in  
491 ratings between the two individuals. If an individual with a high Glicko rating defeats an individual with a  
492 low Glicko rating, relatively few points would be added to their total and relatively few points would be  
493 subtracted from the defeated individual. If an individual with a low Glicko rating defeats an individual



494 with a high Glicko rating, a larger number of points would be added to their total and subtracted from  
495 the loser. Glicko ratings of all individuals in each group are recalculated after every behavioral  
496 interaction. We used a constant value of 3 in our calculations of Glicko ratings. See Williamson et al.<sup>26</sup>  
497 for more information. Glicko ratings were calculated using the 'PlayerRatings' package v.1.0 in R<sup>109</sup>.

498

#### 499 **Comparison of female social hierarchy behavior to male social hierarchy behavior**

500 To measure differences in social hierarchy structure between male and female social groups, we  
501 compared female data from this study with previously published data on male social hierarchies from  
502 Williamson et al.<sup>26</sup>. We recalculated hierarchy measures using the first fourteen days of observation data  
503 from the 10 groups of 12 male CD-1 mice who were housed and observed in exactly the same manner as  
504 the female groups in the current study. We used Wilcoxon rank sum tests to compare the values of  
505 Landau's modified  $h'$ , triangle transitivity, steepness, directional consistency, despotism and Gini-  
506 coefficient of wins and losses between male and female groups.

#### 507 **Analysis of hourly occurrence rate of each agonistic behavior**

508 All Bayesian linear and generalized linear regressions were fitted using R package 'brms'<sup>110</sup>. For each  
509 fighting, chasing, and mounting behavior observed throughout the group housing period for each  
510 cohort, we tested whether the day of group housing affects hourly occurrence rate of each behavior by  
511 fitting the data with a gaussian distribution. Then we analyzed if the hourly occurrence rate of each  
512 behavior differs by individual final social rank using a two-process hurdle-gamma family. In this model,  
513 the probability of having zeros as the occurrence rates are modelled with a binomial error distribution  
514 with logit link function and non-zero non-integer continuous values are fitted with a gamma error  
515 distribution with log link<sup>111</sup>. We chose to use this model as the hourly occurrence rate data contains a  
516 significant number of zeros as subordinate individuals often barely initiate agonistic behaviors and alpha  
517 individuals barely receive aggression especially once the hierarchies are established. Further in this  
518 model we assume the difference of any effect of individual ranks is not necessarily equidistant between  
519 ranks. We therefore treated individual social rank as a monotonic predictor rather than a continuous  
520 variable throughout the entire statistical analysis<sup>112</sup>. The beta coefficients estimated from monotonic  
521 models presented in this study indicate the direction and the size (range between the lowest and  
522 highest categories of the ordinal fixed factor e.g. rank) of the effects.

#### 523 **Analysis of estrus cycle state**

524 We tested whether a mouse with higher social rank in the hierarchy is more likely to be in one estrus  
525 state compared to another by fitting a multinomial logistic mixed effect model with estrus status as the  
526 outcome variable, individual social rank as a monotonic predictor and cohort ID and subject ID as  
527 random effects. We tested whether an individual is more likely to give (hourly given aggression rate) or  
528 receive (hourly received aggression rate) each agonistic behavior when the mouse is in a certain estrus  
529 status using a hurdle-gamma model. First, the probability of the hourly occurrence rate being zero was



530 predicted for each individual with daily Glicko rank of each mouse as a monotonic predictor to test  
531 whether the observed number of zeros in the data could be explained by rank. After this hurdle, the  
532 non-zero values of the hourly occurrence rate were fitted with a predictor of estrus state for each  
533 individual across each group housing day. Cohort ID, subject ID and day of group housing were set as  
534 random effects for both processes.

### 535 **Analysis of plasma corticosterone and estradiol levels**

536 Using leave-one-out cross-validation information criteria (LOOIC)<sup>113</sup>, we compared four models with  
537 different combination of fixed effects: i) dominant-subordinate status, ii) last measured estrus cycle  
538 before blood collection, iii) dominant-subordinate status and last measured estrus state, iv) the  
539 interaction of social status and estrus state. All models were fitted with cohort ID as a random effect.  
540 For corticosterone data, a model with dominant-subordinate status only resulted in the best fit. A model  
541 with the status and the estrus state resulted in the best fit for estradiol data.

### 542 **Analysis of gene expression levels**

543 Using the R package 'MCMC.qpcr'<sup>114</sup>, we analyzed the differences in gene expression between dominant  
544 and subordinate mice by fitting a generalized mixed effect model with Poisson-lognormal distribution  
545 and a Bayesian Markov Chain Monte Carlo sampling approach. This approach provides advantages  
546 compared to standard delta-CT analysis as it accounts for random variation between duplicates,  
547 increases power by analyzing data for all target genes in one model, and does not require control  
548 genes<sup>115</sup>. Briefly, the raw threshold cycle (CT) values were converted into molecule count data with  
549 consideration of the amplification efficiency of each gene. We fitted the model with dominant-  
550 subordinate status category as a fixed factor and cohort ID and subject ID as random factors. We  
551 confirmed linearity of the model by inspecting diagnostic plots.

### 552 **Data availability statement**

553 All raw data and code used in this paper are publicly available at GitHub  
554 <https://github.com/jalapic/females>

### 555 **References**

- 556 1. Lenkov, K., Lee, M. H., Lenkov, O. D., Swafford, A. & Fernald, R. D. Epigenetic DNA Methylation  
557 Linked to Social Dominance. *PLOS ONE* **10**, e0144750 (2015).
- 558 2. Maruska, K. P. & Fernald, R. D. Social Regulation of Gene Expression in the Hypothalamic-Pituitary-  
559 Gonadal Axis. *Physiology* **26**, 412–423 (2011).
- 560 3. Rosvold, H. Enger, H., Mirsky, A. F. & Pribram, K. H. Influence of amygdectomy on social behavior  
561 in monkeys. *J. Comp. Physiol. Psychol.* **47**, 173–178 (1954).

- 562 4. Wang, F. *et al.* Bidirectional Control of Social Hierarchy by Synaptic Efficacy in Medial Prefrontal  
563 Cortex. *Science* **334**, 693–697 (2011).
- 564 5. Williamson, C. M., Franks, B. & Curley, J. P. Mouse Social Network Dynamics and Community  
565 Structure are Associated with Plasticity-Related Brain Gene Expression. *Front. Behav. Neurosci.* **10**,  
566 (2016).
- 567 6. Williamson, C. M., Romeo, R. D. & Curley, J. P. Dynamic changes in social dominance and mPOA  
568 GnRH expression in male mice following social opportunity. *Horm. Behav.* **87**, 80–88 (2017).
- 569 7. Erskine, M. S., Barfield, R. J. & Goldman, B. D. Intraspecific fighting during late pregnancy and  
570 lactation in rats and effects of litter removal. *Behav. Biol.* **23**, 206–218 (1978).
- 571 8. Haney, M., Debold, J. F. & Miczek, K. A. Maternal aggression in mice and rats towards male and  
572 female conspecifics. *Aggress. Behav.* **15**, 443–453 (1989).
- 573 9. Been, L. E., Gibbons, A. B. & Meisel, R. L. Towards a neurobiology of female aggression.  
574 *Neuropharmacology* (2018). doi:10.1016/j.neuropharm.2018.11.039
- 575 10. Duque-Wilckens, N. & Trainor, B. C. Behavioral Neuroendocrinology of Female Aggression. *Oxf.*  
576 *Res. Encycl. Neurosci.* (2017). doi:10.1093/acrefore/9780190264086.013.11
- 577 11. Holekamp, K. E. & Strauss, E. D. Aggression and dominance: an interdisciplinary overview. *Curr.*  
578 *Opin. Behav. Sci.* **12**, 44–51 (2016).
- 579 12. Correa, L. A., Frugone, M. J. & Soto-Gamboa, M. Social dominance and behavioral consequences of  
580 intrauterine position in female groups of the social rodent *Octodon degus*. *Physiol. Behav.* **119**,  
581 161–167 (2013).
- 582 13. Rutberg, A. T. Dominance and Its Fitness Consequences in American Bison Cows. *Behaviour* **96**, 62–  
583 91 (1986).
- 584 14. Barrette, C. & Vandal, D. Social Rank, Dominance, Antler Size, and Access To Food in Snow-Bound  
585 Wild Woodland Caribou. *Behaviour* **97**, 118–145 (1986).

- 586 15. Ceacero, F. *et al.* Benefits for Dominant Red Deer Hinds under a Competitive Feeding System: Food  
587 Access Behavior, Diet and Nutrient Selection. *PLOS ONE* **7**, e32780 (2012).
- 588 16. Whitten, P. L. Diet and dominance among female vervet monkeys (*Cercopithecus aethiops*). *Am. J.*  
589 *Primatol.* **5**, 139–159 (1983).
- 590 17. Murray, C. M., Eberly, L. E. & Pusey, A. E. Foraging strategies as a function of season and rank  
591 among wild female chimpanzees (*Pan troglodytes*). *Behav. Ecol.* **17**, 1020–1028 (2006).
- 592 18. Chovnick, A., Yasukawa, N. J., Monder, H. & Christian, J. J. Female behavior in populations of mice  
593 in the presence and absence of male hierarchy. *Aggress. Behav.* **13**, 367–375 (1987).
- 594 19. Yasukawa, N. J., Monder, H., Leff, F. R. & Christian, J. J. Role of female behavior in controlling  
595 population growth in mice. *Aggress. Behav.* **11**, 49–64 (1985).
- 596 20. Weidt, A., Gyax, L., Palme, R., Touma, C. & König, B. Impact of male presence on female sociality  
597 and stress endocrinology in wild house mice (*Mus musculus domesticus*). *Physiol. Behav.* **189**, 1–9  
598 (2018).
- 599 21. Palanza, P., Della Seta, D., Ferrari, P. F. & Parmigiani, S. Female competition in wild house mice  
600 depends upon timing of female/male settlement and kinship between females. *Anim. Behav.* **69**,  
601 1259–1271 (2005).
- 602 22. Rusu, A. S. & Krackow, S. Kin-preferential cooperation, dominance-dependent reproductive skew,  
603 and competition for mates in communally nesting female house mice. *Behav. Ecol. Sociobiol.* **56**,  
604 298–305 (2004).
- 605 23. Schuhr, B. Social structure and plasma corticosterone level in female albino mice. *Physiol. Behav.*  
606 **40**, 689–693 (1987).
- 607 24. van den Berg, W. E., Lamballais, S. & Kushner, S. A. Sex-Specific Mechanism of Social Hierarchy in  
608 Mice. *Neuropsychopharmacology* **40**, 1364–1372 (2015).

- 609 25. Varholick, J. A., Bailoo, J. D., Palme, R. & Würbel, H. Phenotypic variability between Social  
610 Dominance Ranks in laboratory mice. *Sci. Rep.* **8**, 6593 (2018).
- 611 26. Williamson, C. M., Lee, W. & Curley, J. P. Temporal dynamics of social hierarchy formation and  
612 maintenance in male mice. *Anim. Behav.* **115**, 259–272 (2016).
- 613 27. Williamson, C. M., Lee, W., Romeo, R. D. & Curley, J. P. Social context-dependent relationships  
614 between mouse dominance rank and plasma hormone levels. *Physiol. Behav.* **171**, 110–119 (2017).
- 615 28. Palanza, P., Gioiosa, L. & Parmigiani, S. Social stress in mice: Gender differences and effects of  
616 estrous cycle and social dominance. *Physiol. Behav.* **73**, 411–420 (2001).
- 617 29. Roberts, D. C. S., Bennett, S. a. L. & Vickers, G. J. The estrous cycle affects cocaine self-  
618 administration on a progressive ratio schedule in rats. *Psychopharmacology (Berl.)* **98**, 408–411  
619 (1989).
- 620 30. Gray, P. Effect of the estrous cycle on conditioned avoidance in mice. *Horm. Behav.* **8**, 235–241  
621 (1977).
- 622 31. Floody, O. R. Hormones and Aggression in Female Mammals. in *Hormones and Aggressive Behavior*  
623 39–89 (Springer, Boston, MA, 1983). doi:10.1007/978-1-4613-3521-4\_3
- 624 32. Davis, E. S. & Marler, C. A. C-FOS changes following an aggressive encounter in female California  
625 mice: A synthesis of behavior, hormone changes and neural activity. *Neuroscience* **127**, 611–624  
626 (2004).
- 627 33. Ho, H.-P. *et al.* The Serotonin Reuptake Inhibitor Fluoxetine Reduces Sex Steroid-Related  
628 Aggression in Female Rats: An Animal Model of Premenstrual Irritability?  
629 *Neuropsychopharmacology* **24**, 502–510 (2001).
- 630 34. Seward, J. P. Aggressive behavior in the rat. I. General characteristics; age and sex differences. *J.*  
631 *Comp. Psychol.* **38**, 175–197 (1945).

- 632 35. Ciaccio, L. A., Lisk, R. D. & Reuter, L. A. Prelordotic behavior in the hamster: A hormonally  
633 modulated transition from aggression to sexual receptivity. *J. Comp. Physiol. Psychol.* **93**, 771–780  
634 (1979).
- 635 36. Floody, O. R. & Pfaff, D. W. Aggressive behavior in female hamsters: The hormonal basis for  
636 fluctuations in female aggressiveness correlated with estrous state. *J. Comp. Physiol. Psychol.* **91**,  
637 443–464 (1977).
- 638 37. Ward Kislak, J. & Beach, F. A. INHIBITION OF AGGRESSIVENESS BY OVARIAN HORMONES.  
639 *Endocrinology* **56**, 684–692 (1955).
- 640 38. Wise, D. A. Aggression in the female golden hamster: Effects of reproductive state and social  
641 isolation. *Horm. Behav.* **5**, 235–250 (1974).
- 642 39. Barr, G. A., Gibbons, J. L. & Moyer, K. E. Male-female differences and the influence of neonatal and  
643 adult testosterone on intraspecies aggression in rats. *J. Comp. Physiol. Psychol.* **90**, 1169–1183  
644 (1976).
- 645 40. Cordero, M. I., Ansermet, F. & Sandi, C. Long-term programming of enhanced aggression by  
646 peripuberty stress in female rats. *Psychoneuroendocrinology* **38**, 2758–2769 (2013).
- 647 41. Jong, T. R. de, Beiderbeck, D. I. & Neumann, I. D. Measuring Virgin Female Aggression in the  
648 Female Intruder Test (FIT): Effects of Oxytocin, Estrous Cycle, and Anxiety. *PLOS ONE* **9**, e91701  
649 (2014).
- 650 42. Takahashi, L. K. & Lisk, R. D. Intrasexual interactions among female golden hamsters (*Mesocricetus*  
651 *auratus*) over the estrous cycle. *J. Comp. Psychol. Wash. DC 1983* **98**, 267–275 (1984).
- 652 43. Hyde, J. S. & Sawyer, T. F. Estrous cycle fluctuations in aggressiveness of house mice. *Horm. Behav.*  
653 **9**, 290–295 (1977).

- 654 44. Koonce, C. J. & Frye, C. A. Female mice with deletion of Type One 5 $\alpha$ -reductase have reduced  
655 reproductive responding during proestrus and after hormone-priming. *Pharmacol. Biochem.*  
656 *Behav.* **122**, 20–29 (2014).
- 657 45. Albert, D. J., Petrovic, D. M. & Walsh, M. L. Ovariectomy attenuates aggression by female rats  
658 cohabitating with sexually active sterile males. *Physiol. Behav.* **45**, 225–228 (1989).
- 659 46. Rosvall, K. A. *et al.* Neural sensitivity to sex steroids predicts individual differences in aggression:  
660 implications for behavioural evolution. *Proc. R. Soc. Lond. B Biol. Sci.* rspb20120442 (2012).  
661 doi:10.1098/rspb.2012.0442
- 662 47. Rubenstein, D. R. & Wikelski, M. Steroid hormones and aggression in female Galápagos marine  
663 iguanas. *Horm. Behav.* **48**, 329–341 (2005).
- 664 48. Pfaff, D. W. *et al.* Estrogens, brain and behavior: studies in fundamental neurobiology and  
665 observations related to women's health. *J. Steroid Biochem. Mol. Biol.* **74**, 365–373 (2000).
- 666 49. Dadomo, H. *et al.* What is stressful for females? Differential effects of unpredictable  
667 environmental or social stress in CD1 female mice. *Horm. Behav.* **98**, 22–32 (2018).
- 668 50. Jacobson-Pick, S., Audet, M.-C., McQuaid, R. J., Kalvapalle, R. & Anisman, H. Social agonistic  
669 distress in male and female mice: changes of behavior and brain monoamine functioning in  
670 relation to acute and chronic challenges. *PLoS One* **8**, e60133 (2013).
- 671 51. Chapman, J. C., Christian, J. J., Pawlikowski, M. A. & Michael, S. D. Analysis of steroid hormone  
672 levels in female mice at high population density. *Physiol. Behav.* **64**, 529–533 (1998).
- 673 52. Kaufmann, J. H. On the Definitions and Functions of Dominance and Territoriality. *Biol. Rev.* **58**, 1–  
674 20 (1983).
- 675 53. Rowell, T. E. The concept of social dominance. *Behav. Biol.* **11**, 131–154 (1974).
- 676 54. Stockley, P. & Bro-Jørgensen, J. Female competition and its evolutionary consequences in  
677 mammals. *Biol. Rev.* **86**, 341–366 (2011).

- 678 55. Dagg, A. I. Homosexual behaviour and female-male mounting in mammals—a first survey.  
679 *Mammal Rev.* **14**, 155–185 (1984).
- 680 56. Fang, J. & Clemens, L. G. Contextual determinants of female–female mounting in laboratory rats.  
681 *Anim. Behav.* **57**, 545–555 (1999).
- 682 57. Kimchi, T., Xu, J. & Dulac, C. A functional circuit underlying male sexual behaviour in the female  
683 mouse brain. *Nature* **448**, 1009–1014 (2007).
- 684 58. Dean, M. D., Ardlie, K. G. & Nachman, M. W. The frequency of multiple paternity suggests that  
685 sperm competition is common in house mice (*Mus domesticus*). *Mol. Ecol.* **15**, 4141–4151 (2006).
- 686 59. Bronson, F. H. The Reproductive Ecology of the House Mouse. *Q. Rev. Biol.* **54**, 265–299 (1979).
- 687 60. Bronson, F. H. Mammalian Reproduction: An Ecological Perspective. *Biol. Reprod.* **32**, 1–26 (1985).
- 688 61. Brain, P. F., Haug, M. & Parmigiani, S. The aggressive female rodent: Redressing a “scientific” bias.  
689 in *Of Mice and Women: Aspects of Female Aggression* 27–35 (Academic Press, San Diego, 1992).
- 690 62. Anthony, T. R. The Ontogeny of Greeting, Grooming, and Sexual Motor Patterns in Captive  
691 Baboons (Superspecies *Papio Cynocephalus*). *Behaviour* **31**, 358–372 (1968).
- 692 63. Talmage-Riggs, G. & Ansel, S. Homosexual Behavior and Dominance Hierarchy in a Group of  
693 Captive Female Squirrel Monkeys (*Saimiri sciureus*). *Folia Primatol. (Basel)* **19**, 61–72 (1973).
- 694 64. Borries, C., Sommer, V. & Srivastava, A. Dominance, age, and reproductive success in free-ranging  
695 female hanuman langurs (*Presbytis entellus*). *Int. J. Primatol.* **12**, 231–257 (1991).
- 696 65. Albonetti, M. E. & Dessi-Fulgheri, F. Female-female mounting in the European rabbit. *Z*  
697 *Saugetierkunde* **55**, 128–138 (1990).
- 698 66. Champlin, A. K. SUPPRESSION OF OESTRUS IN GROUPED MICE: THE EFFECTS OF VARIOUS  
699 DENSITIES AND THE POSSIBLE NATURE OF THE STIMULUS. *Reproduction* **27**, 233–241 (1971).



- 700 67. Ma, W., Miao, Z. & Novotny, M. V. Role of the Adrenal Gland and Adrenal-Mediated Chemosignals  
701 in Suppression of Estrus in the House Mouse: The Lee-Boot Effect Revisited. *Biol. Reprod.* **59**,  
702 1317–1320 (1998).
- 703 68. Van Der Lee, S. & Boot, L. M. Spontaneous pseudopregnancy in mice. *Acta Physiol. Pharmacol.*  
704 *Neerl.* **4**, 442–444 (1955).
- 705 69. Whitten, W. K. OCCURRENCE OF ANOESTRUS IN MICE CAGED IN GROUPS. *J. Endocrinol.* **18**, 102–  
706 107 (1959).
- 707 70. Lenz, K. M., Nugent, B. M. & McCarthy, M. M. Sexual Differentiation of the Rodent Brain: Dogma  
708 and Beyond. *Front. Neurosci.* **6**, (2012).
- 709 71. Wu, M. V. *et al.* Estrogen Masculinizes Neural Pathways and Sex-Specific Behaviors. *Cell* **139**, 61–  
710 72 (2009).
- 711 72. Ervin, K. S. J. *et al.* Estrogen involvement in social behavior in rodents: Rapid and long-term actions.  
712 *Horm. Behav.* **74**, 53–76 (2015).
- 713 73. Schulz, K. M. & Sisk, C. L. The organizing actions of adolescent gonadal steroid hormones on brain  
714 and behavioral development. *Neurosci. Biobehav. Rev.* **70**, 148–158 (2016).
- 715 74. Harris, A. Z. *et al.* A Novel Method for Chronic Social Defeat Stress in Female Mice.  
716 *Neuropsychopharmacology* **43**, 1276–1283 (2018).
- 717 75. Jarcho, M. R., Massner, K. J., Eggert, A. R. & Wichelt, E. L. Behavioral and physiological response to  
718 onset and termination of social instability in female mice. *Horm. Behav.* **78**, 135–140 (2016).
- 719 76. Schmidt, M. V. *et al.* A novel chronic social stress paradigm in female mice. *Horm. Behav.* **57**, 415–  
720 420 (2010).
- 721 77. Timmer, M. & Sandi, C. A role for glucocorticoids in the long-term establishment of a social  
722 hierarchy. *Psychoneuroendocrinology* **35**, 1543–1552 (2010).

- 723 78. Weger, M. *et al.* Increased brain glucocorticoid actions following social defeat in rats facilitates the  
724 long-term establishment of social subordination. *Physiol. Behav.* **186**, 31–36 (2018).
- 725 79. Malsbury, C. W., Strull, D. & Daood, J. Half-cylinder cuts antero-lateral to the ventromedial nucleus  
726 reduce sexual receptivity in female golden hamsters. *Physiol. Behav.* **21**, 79–87 (1978).
- 727 80. Meisel, R. L., Sterner, M. R. & Diekman, M. A. Differential hormonal control of aggression and  
728 sexual behavior in female Syrian hamsters. *Horm. Behav.* **22**, 453–466 (1988).
- 729 81. Takahashi, L. K., Lisk, R. D. & Burnett II, A. L. Dual estradiol action in diencephalon and the  
730 regulation of sociosexual behavior in female golden hamsters. *Brain Res.* **359**, 194–207 (1985).
- 731 82. Hashikawa, K. *et al.* Esr1+ cells in the ventromedial hypothalamus control female aggression. *Nat.*  
732 *Neurosci.* **advance online publication**, (2017).
- 733 83. Ogawa, S., Lubahn, D. B., Korach, K. S. & Pfaff, D. W. Behavioral effects of estrogen receptor gene  
734 disruption in male mice. *Proc. Natl. Acad. Sci.* **94**, 1476–1481 (1997).
- 735 84. Ogawa, S., Taylor, J. A., Lubahn, D. B., Korach, K. S. & Pfaff, D. W. Reversal of Sex Roles in Genetic  
736 Female Mice by Disruption of Estrogen Receptor Gene. *Neuroendocrinology* **64**, 467–470 (1996).
- 737 85. Ogawa, S. *et al.* Roles of Estrogen Receptor- $\alpha$  Gene Expression in Reproduction-Related Behaviors  
738 in Female Mice\*This work was supported by the Harry Frank Guggenheim Foundation (to S.O.), the  
739 University of Missouri-Columbia molecular biology program (to D.B.L.), and NIH Grant HD-05751  
740 (to D.W.P.). *Endocrinology* **139**, 5070–5081 (1998).
- 741 86. Nomura, M. *et al.* Genotype/Age Interactions on Aggressive Behavior in Gonadally Intact Estrogen  
742 Receptor  $\beta$  Knockout ( $\beta$ ERKO) Male Mice. *Horm. Behav.* **41**, 288–296 (2002).
- 743 87. Ogawa, S. *et al.* Survival of reproductive behaviors in estrogen receptor  $\beta$  gene-deficient ( $\beta$ ERKO)  
744 male and female mice. *Proc. Natl. Acad. Sci.* **96**, 12887–12892 (1999).

- 745 88. Clipperton-Allen, A. E., Almey, A., Melichercik, A., Allen, C. P. & Choleris, E. Effects of an estrogen  
746 receptor alpha agonist on agonistic behaviour in intact and gonadectomized male and female  
747 mice. *Psychoneuroendocrinology* **36**, 981–995 (2011).
- 748 89. Clipperton-Allen, A. E., Cragg, C. L., Wood, A. J., Pfaff, D. W. & Choleris, E. Agonistic behavior in  
749 males and females: Effects of an estrogen receptor beta agonist in gonadectomized and gonadally  
750 intact mice. *Psychoneuroendocrinology* **35**, 1008–1022 (2010).
- 751 90. Ogawa, S., Tsukahara, S., Choleris, E. & Vasudevan, N. Estrogenic regulation of social behavior and  
752 sexually dimorphic brain formation. *Neurosci. Biobehav. Rev.* (2018).  
753 doi:10.1016/j.neubiorev.2018.10.012
- 754 91. Ragnauth, A. K. *et al.* Female oxytocin gene-knockout mice, in a semi-natural environment, display  
755 exaggerated aggressive behavior. *Genes Brain Behav.* **4**, 229–239 (2005).
- 756 92. Harmon, A. C., Huhman, K. L., Moore, T. O. & Albers, H. E. Oxytocin Inhibits Aggression in Female  
757 Syrian Hamsters. *J. Neuroendocrinol.* **14**, 963–969 (2002).
- 758 93. McCarthy, M. M. Oxytocin inhibits infanticide in female house mice (*Mus domesticus*). *Horm.*  
759 *Behav.* **24**, 365–375 (1990).
- 760 94. Hammond, M. A. & Rowe, F. A. Medial preoptic and anterior hypothalamic lesions: Influences on  
761 aggressive behavior in female hamsters. *Physiol. Behav.* **17**, 507–513 (1976).
- 762 95. Curley, J. P. Temporal pairwise-correlation analysis provides empirical support for attention  
763 hierarchies in mice. *Biol. Lett.* **12**, 20160192 (2016).
- 764 96. Lee, W., Khan, A. & Curley, J. P. Major urinary protein levels are associated with social status and  
765 context in mouse social hierarchies. *Proc R Soc B* **284**, 20171570 (2017).
- 766 97. Glickman, M. E. Parameter estimation in large dynamic paired comparison experiments. *J. R. Stat.*  
767 *Soc. Ser. C Appl. Stat.* **48**, 377–394 (1999).

- 768 98. De Vries, H. An improved test of linearity in dominance hierarchies containing unknown or tied  
769 relationships. *Anim. Behav.* **50**, 1375–1389 (1995).
- 770 99. Paxinos, G. & Franklin, K. B. J. *The Mouse Brain in Stereotaxic Coordinates*. (Gulf Professional  
771 Publishing, 2004).
- 772 100. Lein, E. S. *et al.* Genome-wide atlas of gene expression in the adult mouse brain. *Nature* **445**, 168–  
773 176 (2007).
- 774 101. R Core Team. *R: A language and environment for statistical computing*. (2017).
- 775 102. Shizuka, D. & McDonald, D. B. A social network perspective on measurements of dominance  
776 hierarchies. *Anim. Behav.* **83**, 925–934 (2012).
- 777 103. Gammell, M. P., Vries, H. de, Jennings, D. J., Carlin, C. M. & Hayden, T. J. David's score: a more  
778 appropriate dominance ranking method than Clutton-Brock *et al.*'s index. *Anim. Behav.* **66**, 601–  
779 605 (2003).
- 780 104. Curley, J. P. *compete: Organizing and Analyzing Social Dominance Hierarchy Data*. (2016).
- 781 105. Leiva, D. & de Vries, H. *steepness: Testing steepness of dominance hierarchies*. (2014).
- 782 106. Zeileis, A. *ineq: Measuring inequality, concentration, and poverty*. (2014).
- 783 107. Butts, C. T. *sna: Tools for Social Network Analysis*. (2016).
- 784 108. Pohlert, T. *PMCMR: Calculate Pairwise Multiple Comparisons of Mean Rank Sums*. (2018).
- 785 109. Stephenson, A. & Sonas, J. *PlayerRatings: Dynamic updating methods for player ratings estimation*.  
786 (2012).
- 787 110. Bürkner, P.-C. brms: An R Package for Bayesian Multilevel Models Using Stan. *J. Stat. Softw.* **1**, 1  
788 (2017).
- 789 111. Pohlmeier, W. & Ulrich, V. An Econometric Model of the Two-Part Decisionmaking Process in the  
790 Demand for Health Care. *J. Hum. Resour.* **30**, 339–361 (1995).

- 791 112. Bürkner, P.-C. & Charpentier, E. Monotonic Effects: A Principled Approach for Including Ordinal  
792 Predictors in Regression Models. (2018). doi:10.31234/osf.io/9qkhj
- 793 113. Gelman, A., Hwang, J. & Vehtari, A. Understanding predictive information criteria for Bayesian  
794 models. *Stat. Comput.* **24**, 997–1016 (2014).
- 795 114. Matz, M. V. *MCMC.qpcr: Bayesian Analysis of qRT-PCR Data*. (2016).
- 796 115. Matz, M. V., Wright, R. M. & Scott, J. G. No Control Genes Required: Bayesian Analysis of qRT-PCR  
797 Data. *PLOS ONE* **8**, e71448 (2013).

798

## 799 **Acknowledgements**

800 We thank Dr. Frances Champagne for advice and suggestions in writing the manuscript and Curley Lab  
801 students for help with behavioral observations.

## 802 **Author contributions statement**

803 CMW, WL, ARD and JPC conceived and planned the experiments. CMW, WL, ARD, RDR and AL carried  
804 out the behavioral work and husbandry. RDR planned and carried out the hormone analysis. CMW and  
805 ARD carried out the gene expression experiment. CMW, WL and JPC analyzed the data. CMW, WL, & JPC  
806 wrote the paper. All authors provided critical feedback and helped shape the research, analysis and  
807 manuscript.

## 808 **Additional information**

### 809 **Competing interests**

810 The authors declare there are no competing interests.

811

## 812 **Table**

813 **Table 1.** Social hierarchy measures for each cohort (A-H). Females have significantly linear hierarchies  
814 (as measured by Landau's Modified  $h'$  value and triangle transitivity (ttri)) as well as significantly steep  
815 hierarchies (steepness). Aggressive behavior is also significantly directionally consistent (DC). Significant  
816 values are bolded. Despotism and the Gini-Coefficient of Wins and Losses measure how evenly  
817 distributed aggressive behavior is across ranks. Female hierarchies are not highly despotic.

818

| Cohort ID | Landau's $h'$ | <i>ttri</i> | Steepness   | DC          | Despotism | GC Wins | GC Losses |
|-----------|---------------|-------------|-------------|-------------|-----------|---------|-----------|
| A         | 0.19          | 0.08        | 0.30        | <b>0.54</b> | 0.15      | 0.24    | 0.22      |
| B         | <b>0.85</b>   | <b>0.88</b> | <b>0.61</b> | <b>0.76</b> | 0.26      | 0.43    | 0.29      |
| C         | <b>0.71</b>   | <b>0.82</b> | <b>0.55</b> | <b>0.70</b> | 0.23      | 0.45    | 0.27      |
| D         | <b>0.67</b>   | <b>0.68</b> | <b>0.48</b> | <b>0.69</b> | 0.22      | 0.43    | 0.23      |
| E         | <b>0.49</b>   | <b>0.48</b> | <b>0.47</b> | <b>0.68</b> | 0.22      | 0.40    | 0.19      |
| F         | <b>0.46</b>   | <b>0.36</b> | <b>0.46</b> | <b>0.72</b> | 0.25      | 0.46    | 0.21      |
| G         | <b>0.82</b>   | <b>0.95</b> | <b>0.55</b> | <b>0.79</b> | 0.34      | 0.49    | 0.21      |
| H         | <b>0.78</b>   | <b>0.90</b> | <b>0.51</b> | <b>0.57</b> | 0.16      | 0.34    | 0.20      |



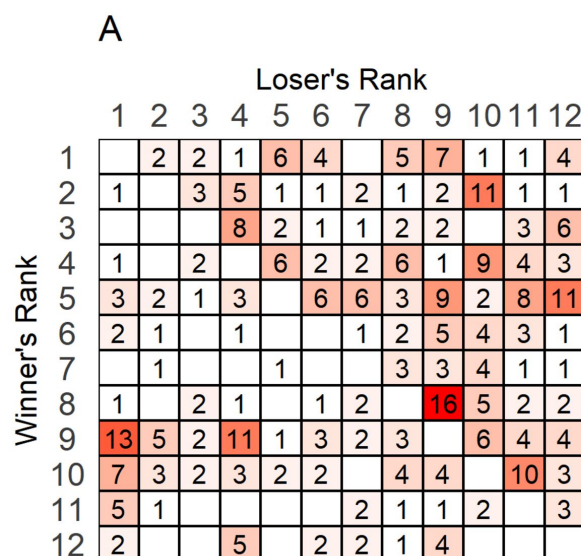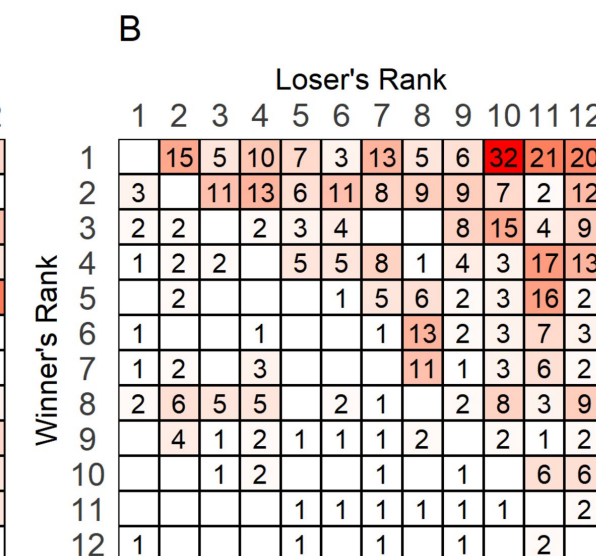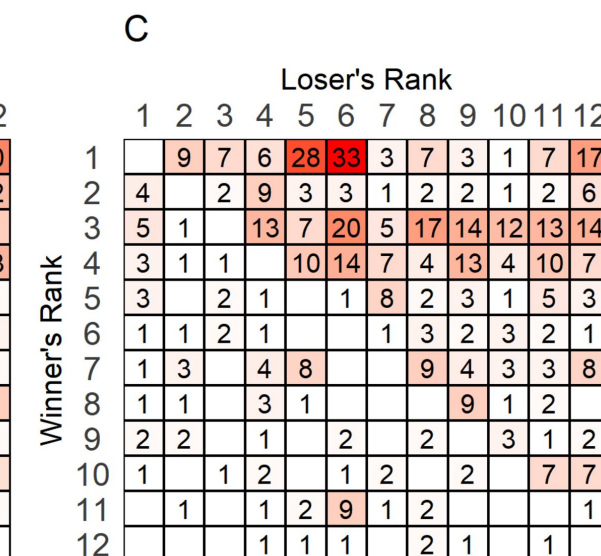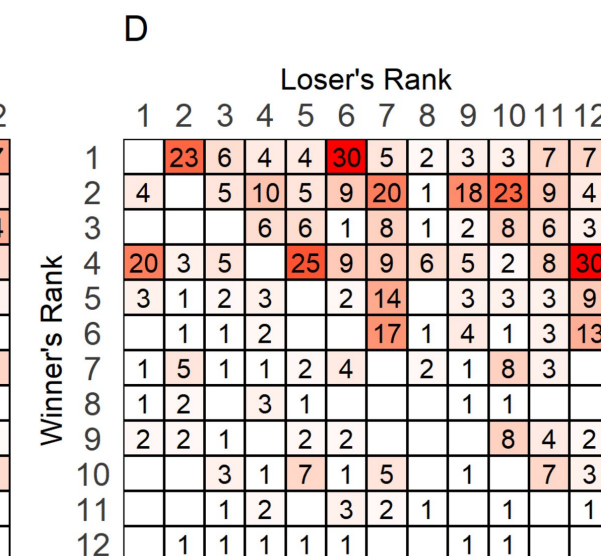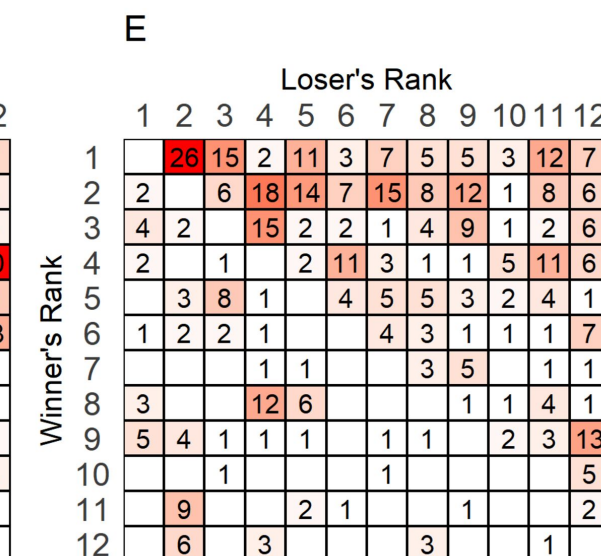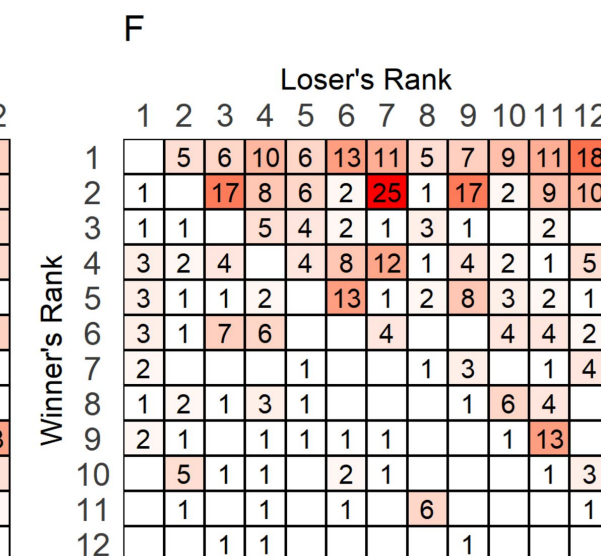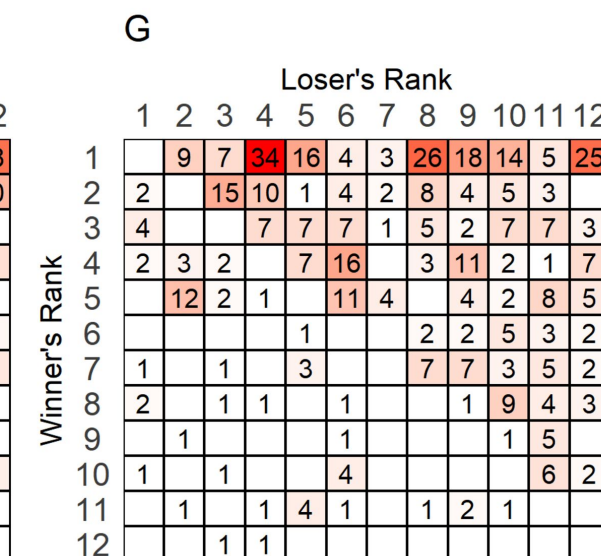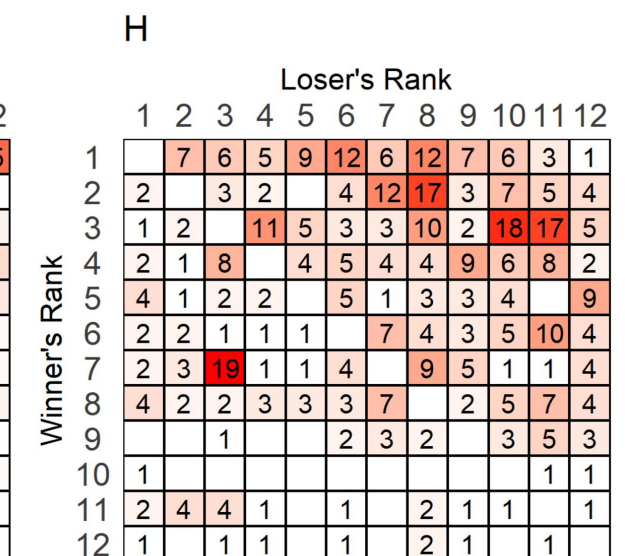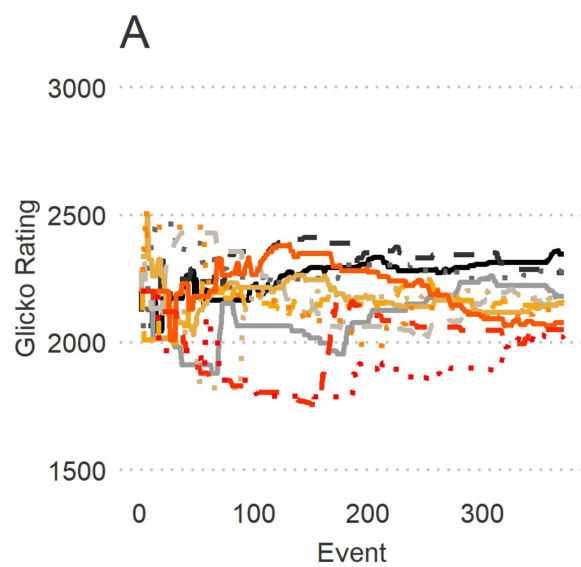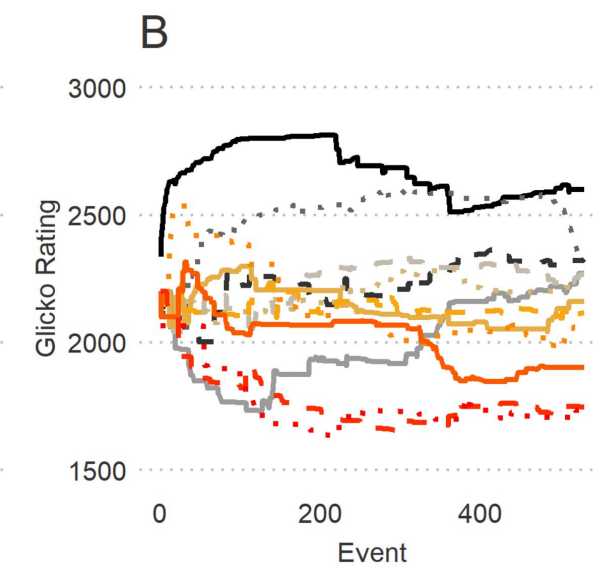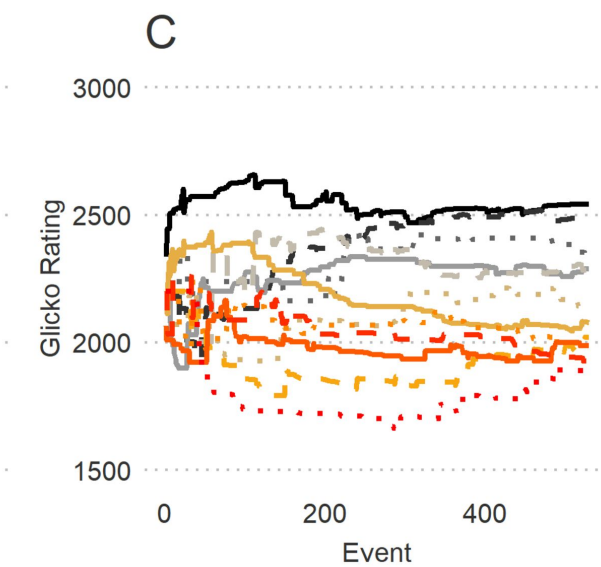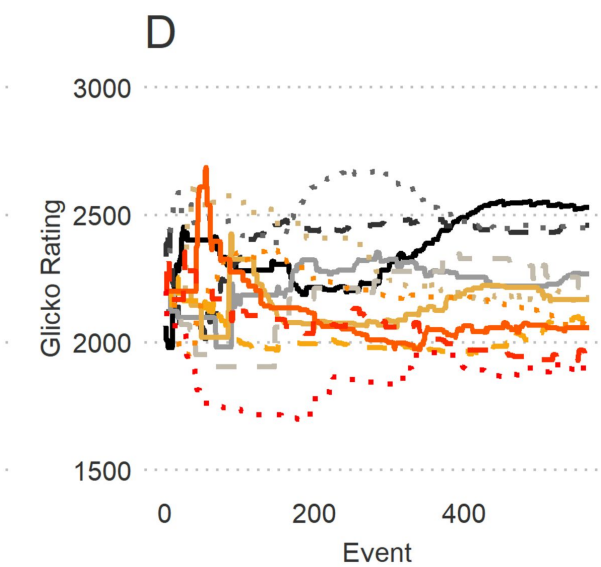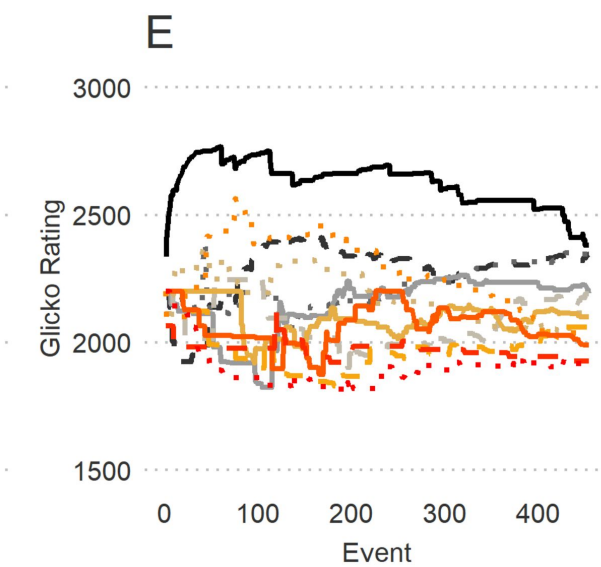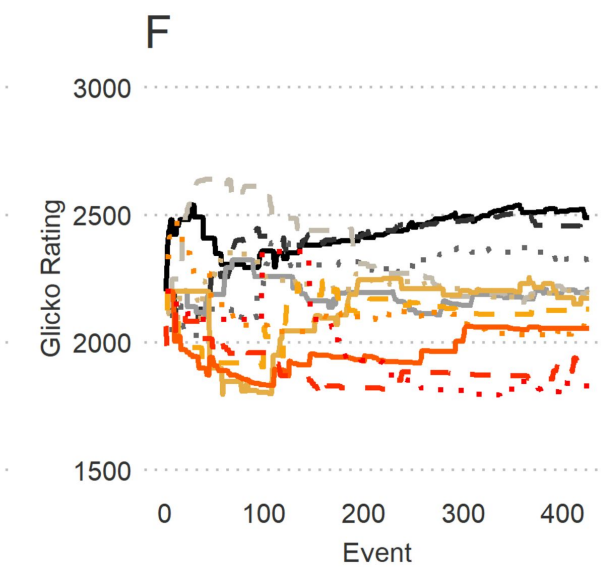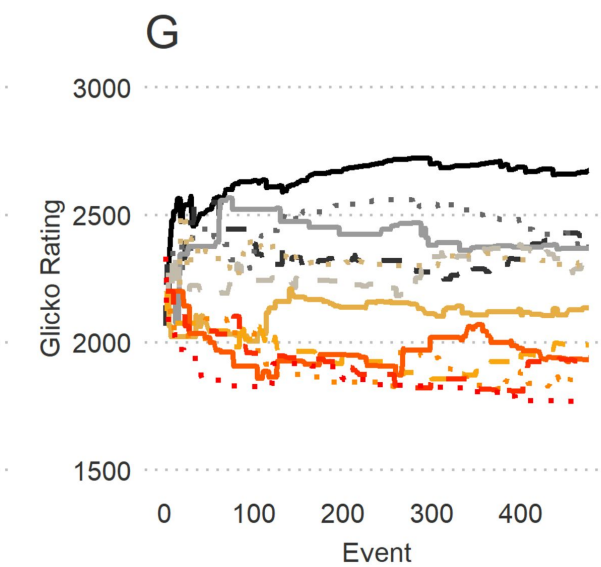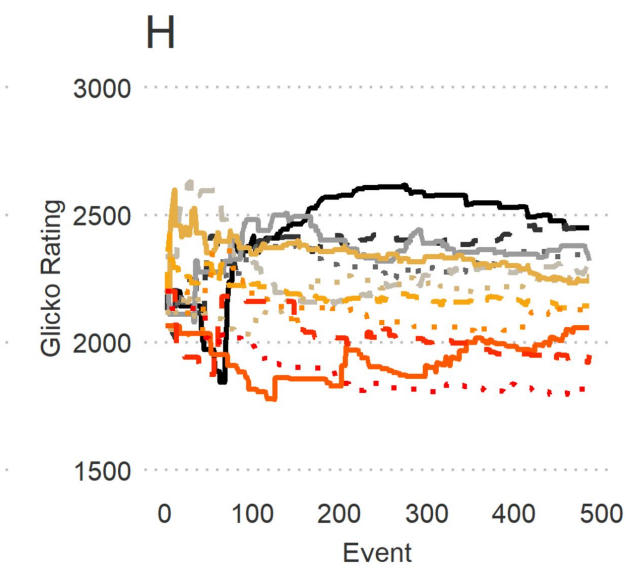





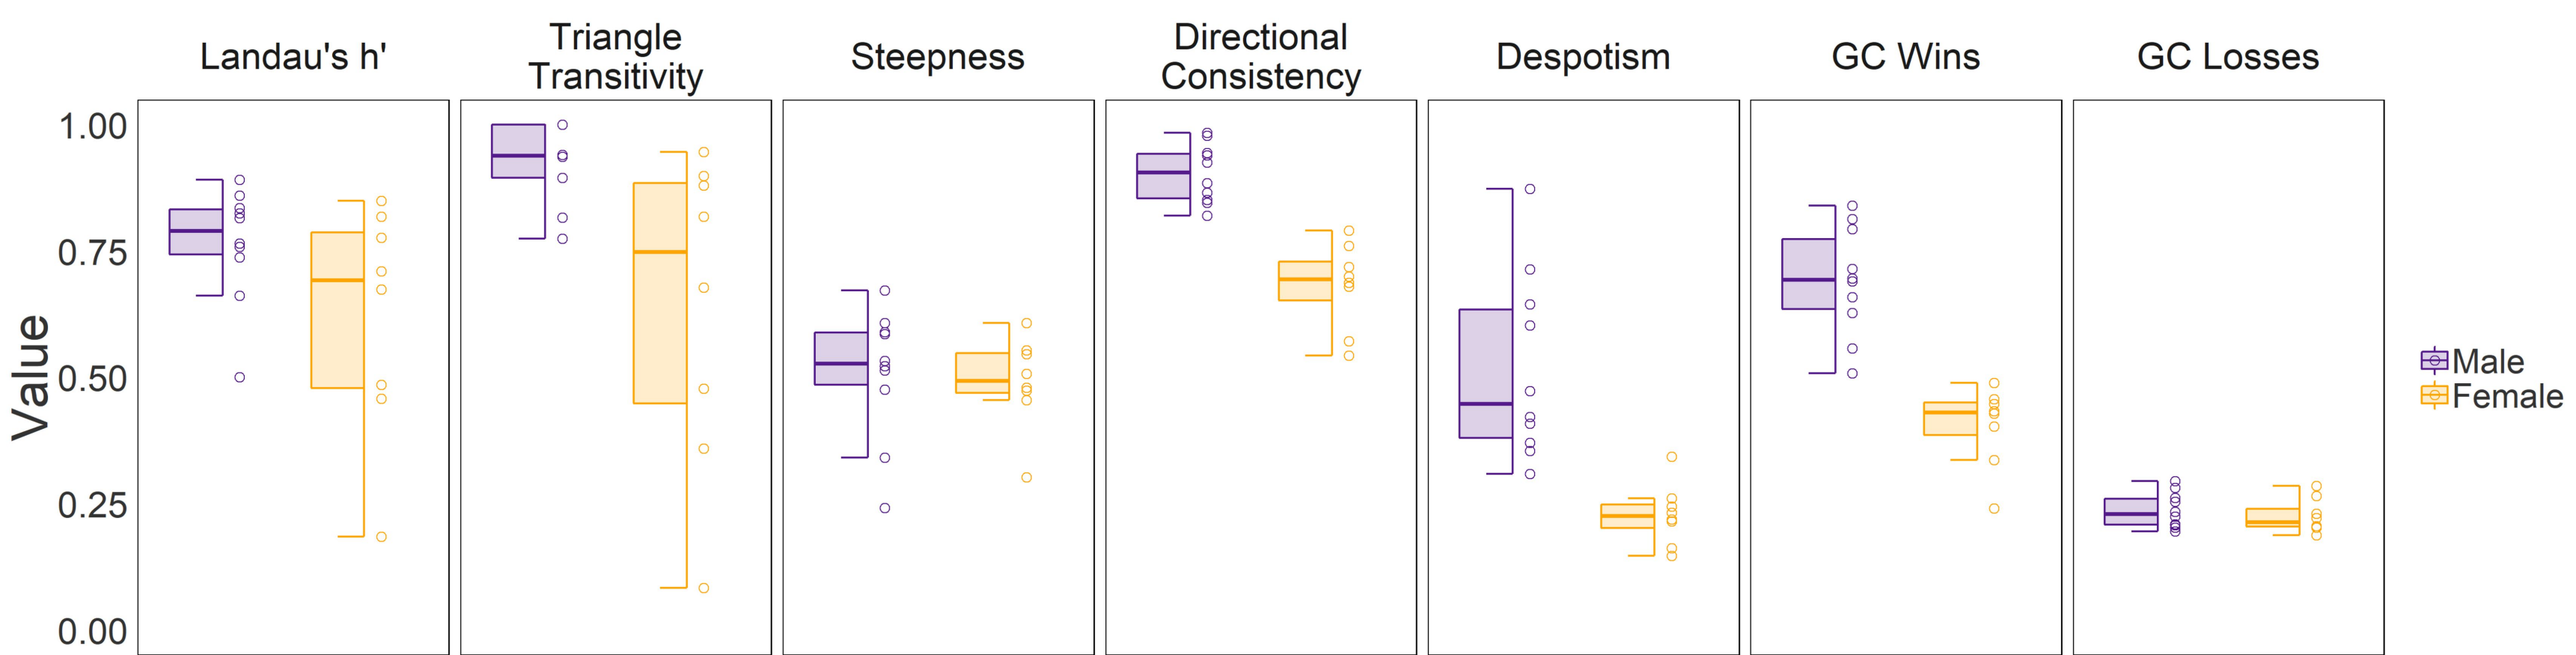

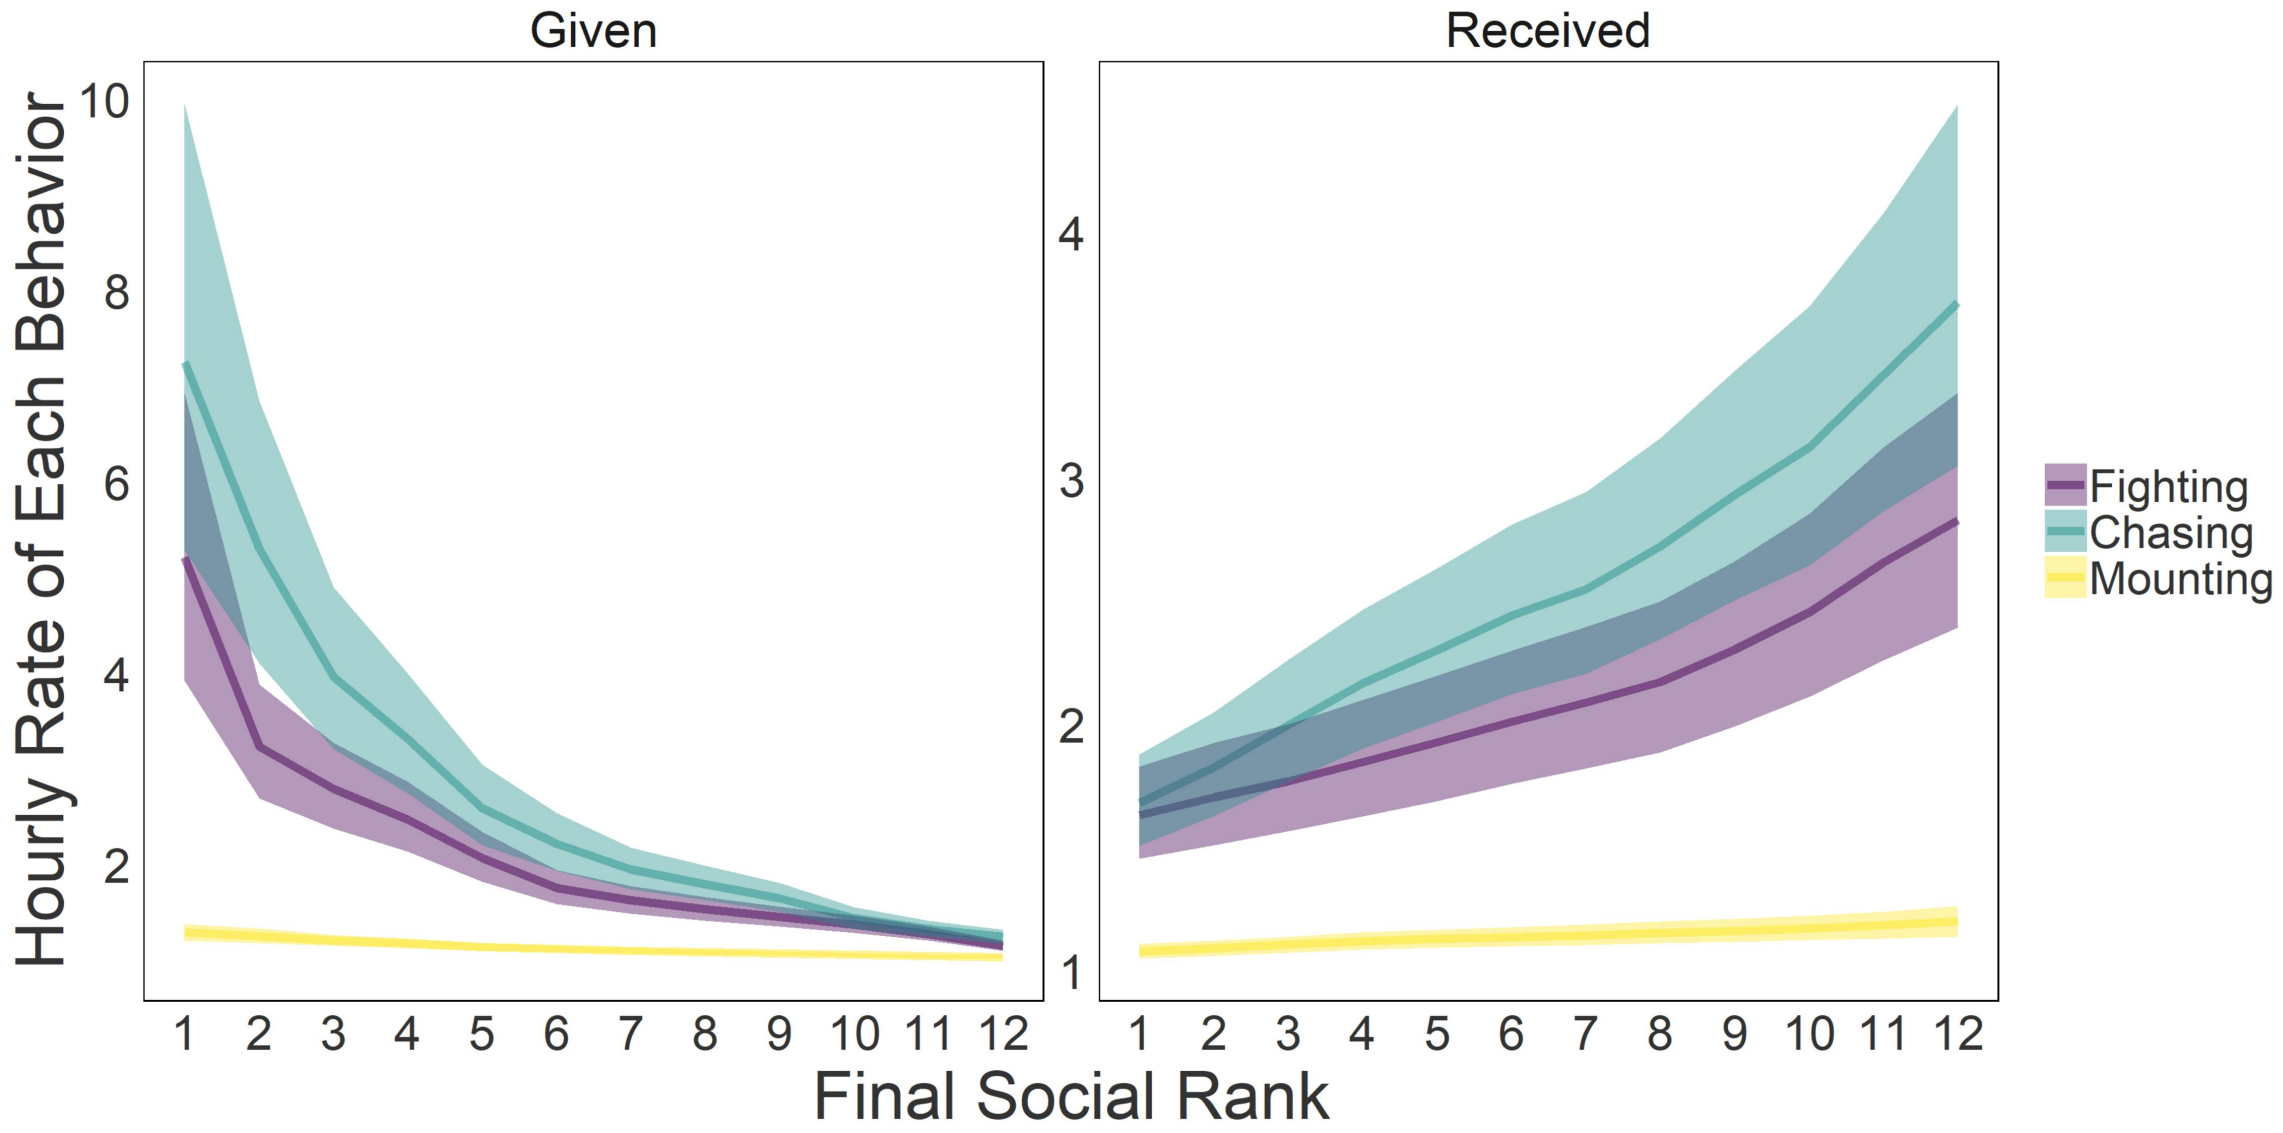

■ Diestrus ■ Metestrus ■ Proestrus ■ Estrus

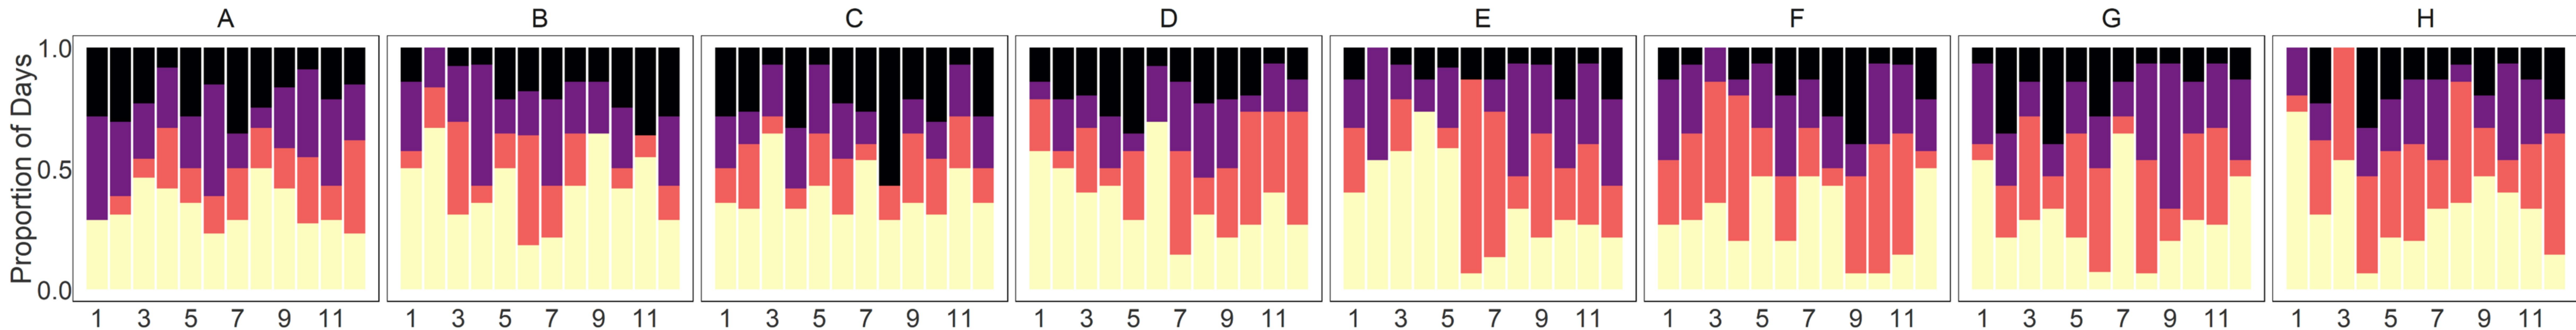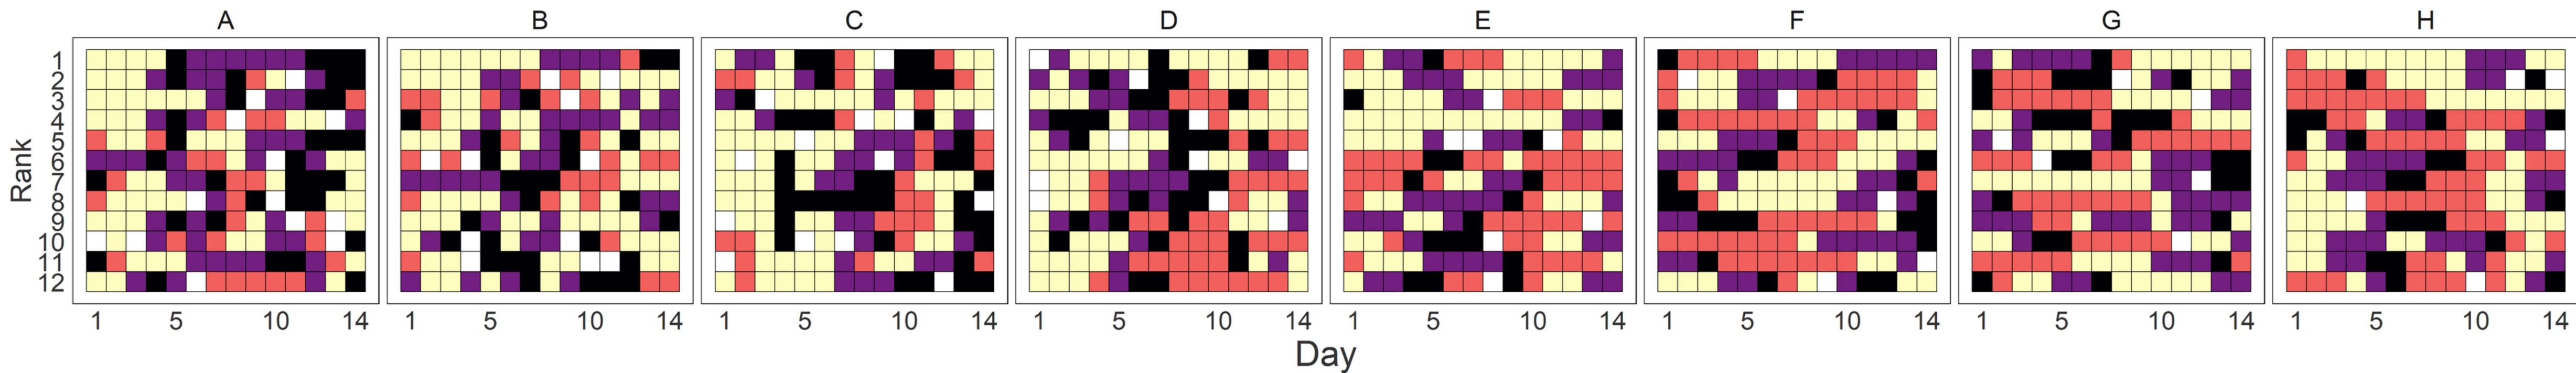

(A)

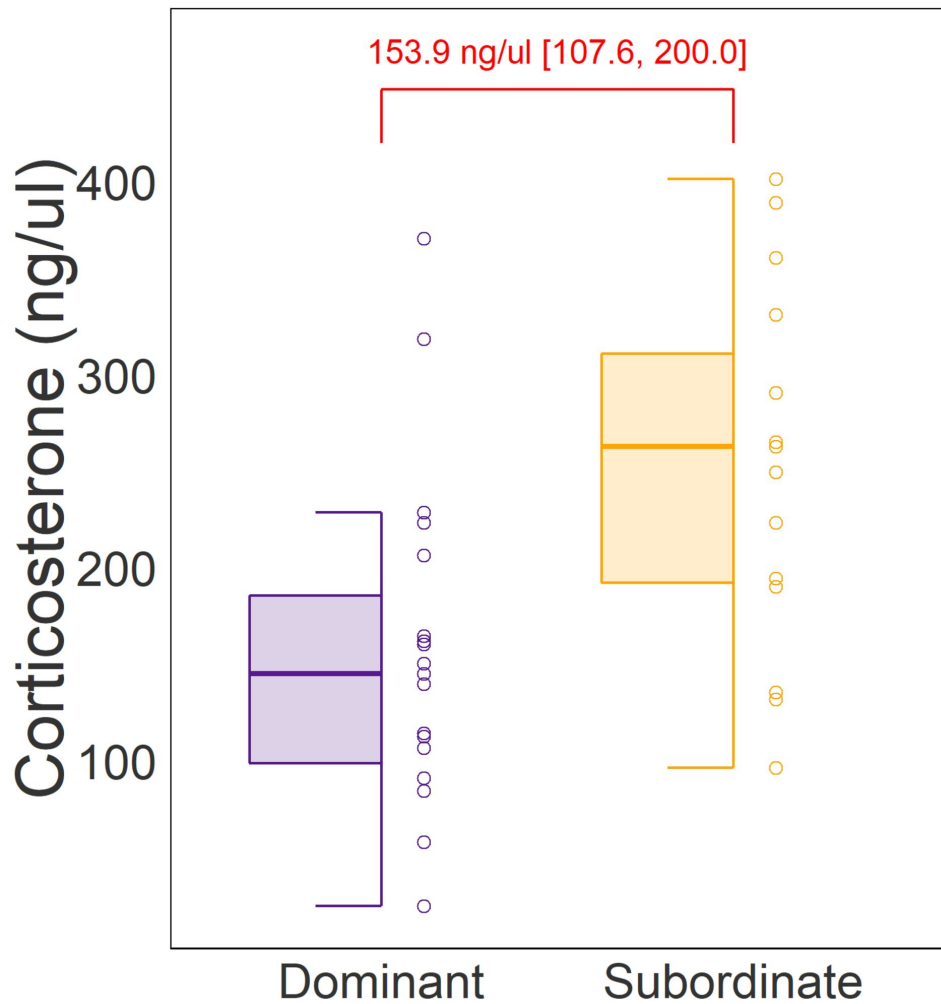

(B)

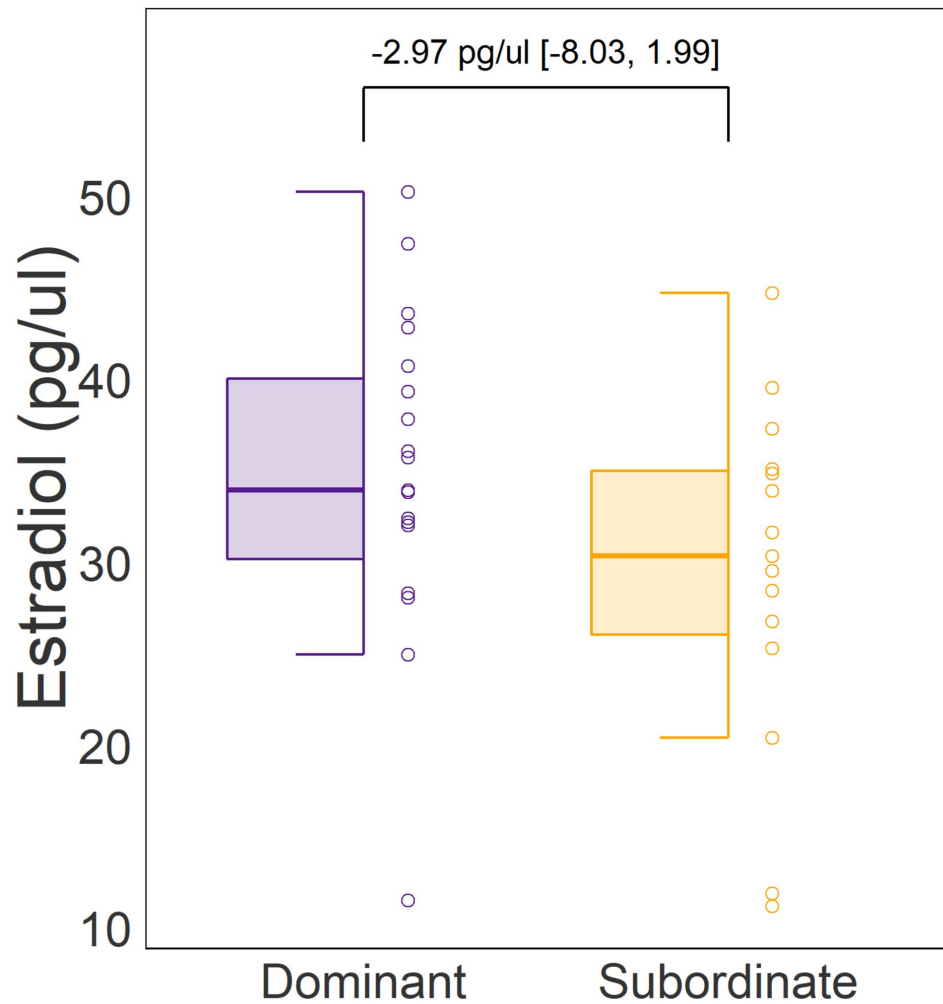

mPOA

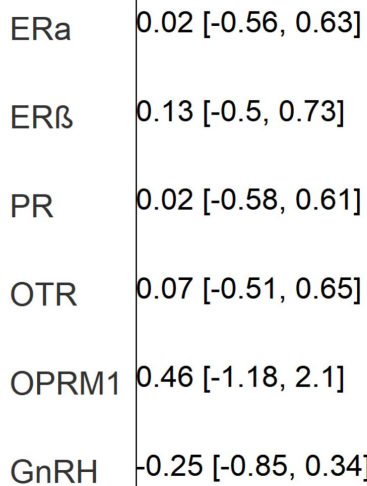

VMH

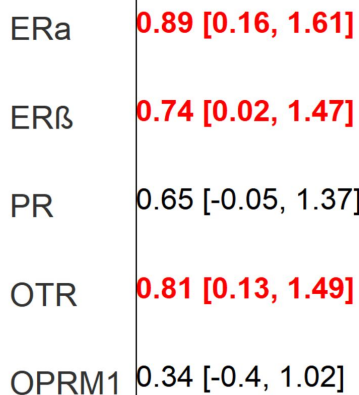

-2

-1

0

1

2

Log2(Fold Change) (mean ± 95% CI)
